# Supplementary material for: Reef Fish Assemblage in Two Insular Zones within the Mexican Central Pacific
Source: MDPI journal article supplement (doi:10.3390/oceans3020015), 2022-05-23
Supplement: s1 [file s1]

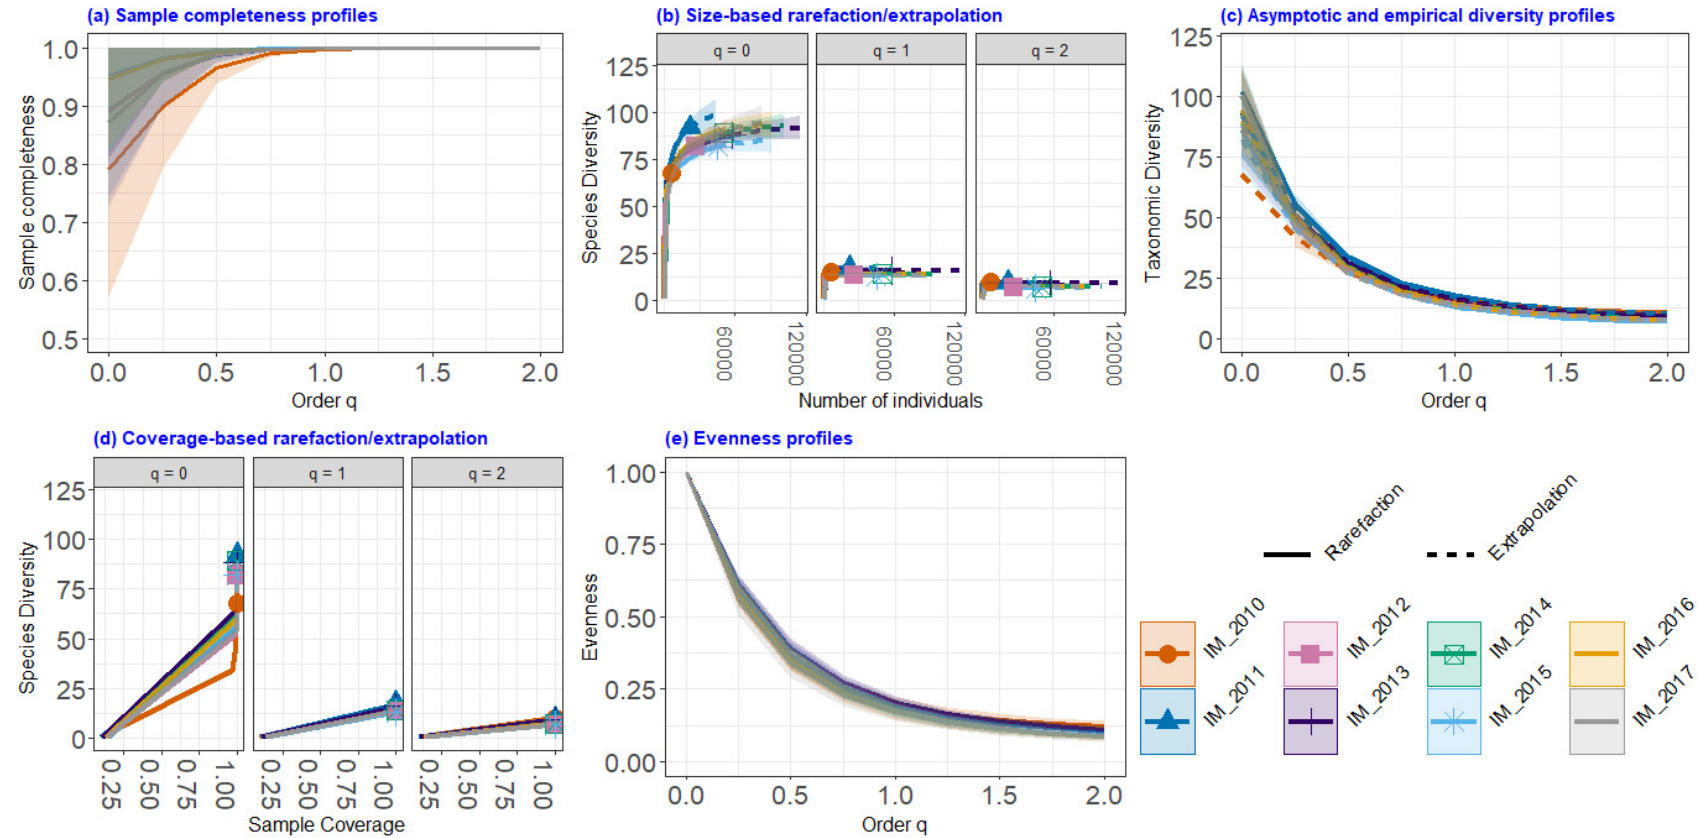

**Figure S1a.-** Four-Step sample completeness evaluation in Marietas Island (IM) reef fish. (a) Estimated sample completeness curves as a function of order  $q$  between 0 and 2. (b) Size-based rarefaction (solid lines) and extrapolation (dashed lines) curves up to double the reference sample. (c) The asymptotic estimates of diversity profiles (solid lines) and empirical diversity profiles (dotted lines). (d) Coverage-based rarefaction (solid lines) and extrapolation (dashed lines) curves up to the corresponding coverage value for a doubling of each reference sample size. (e) Evenness profile as a function of order  $q$ ,  $0 < q \leq 2$ , based on the normalized slope of Hill numbers. Solid dots and triangles denote observed data points. All shaded areas in (a)–(d) denote 95% confidence bands obtained from a bootstrap method with 1000 replications. Some bands are invisible due to narrow widths. Numerical values for the three special cases of  $q = 0$ , 1, and 2 are shown in Table 1.

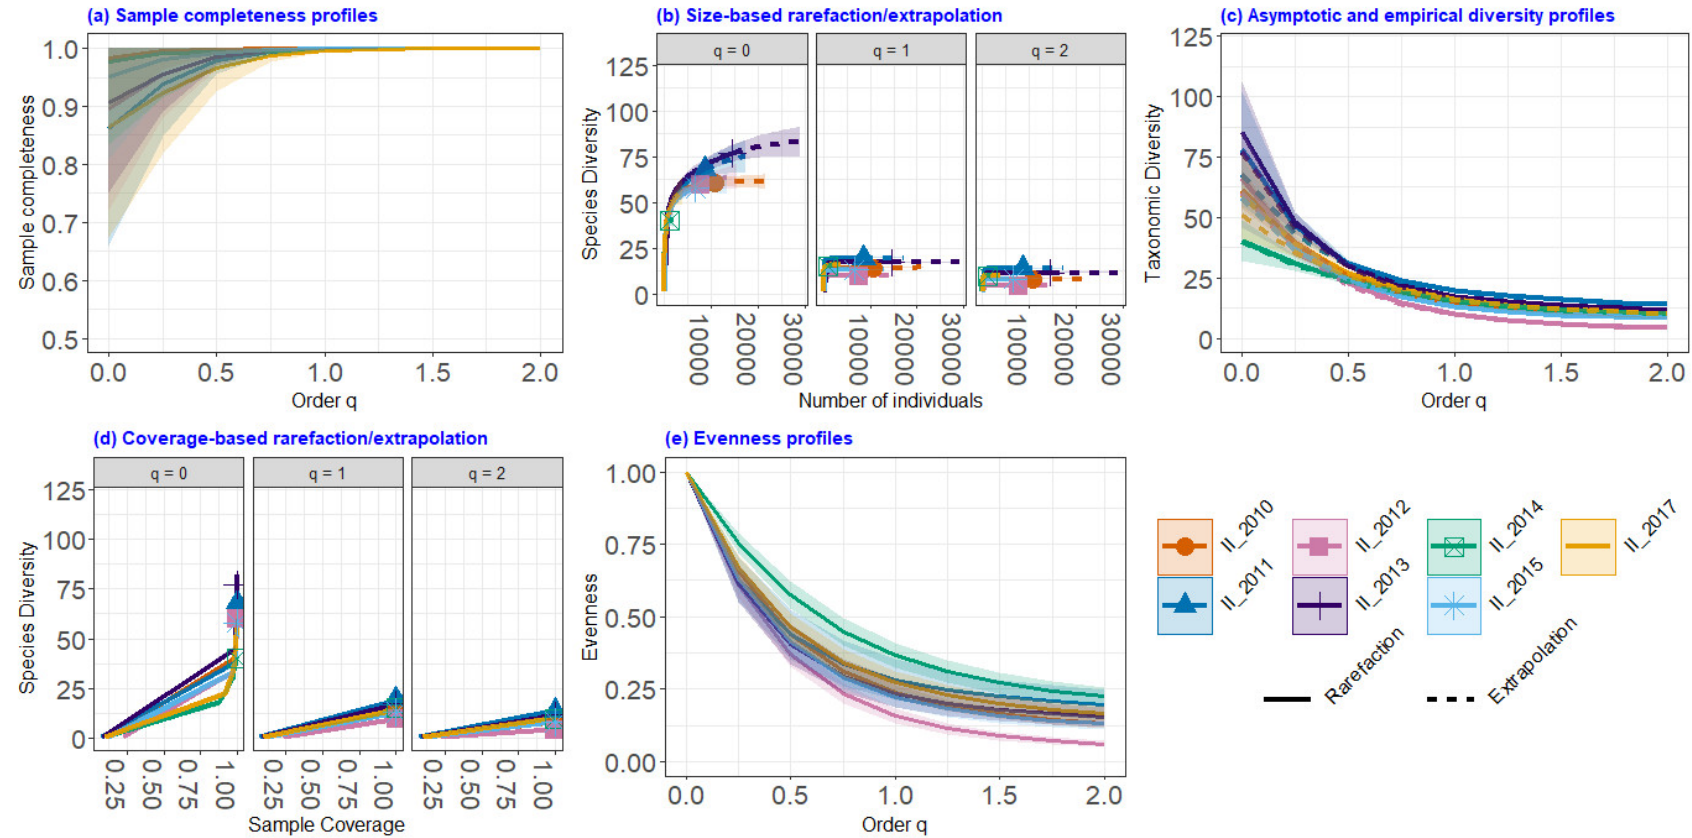

**Figure S1b.** Four-Step sample completeness evaluation in Isabel Island (IM) reef fish. (a) Estimated sample completeness curves as a function of order  $q$  between 0 and 2. (b) Size-based rarefaction (solid lines) and extrapolation (dashed lines) curves up to double the reference sample. (c) The asymptotic estimates of diversity profiles (solid lines) and empirical diversity profiles (dotted lines). (d) Coverage-based rarefaction (solid lines) and extrapolation (dashed lines) curves up to the corresponding coverage value for a doubling of each reference sample size. (e) Evenness profile as a function of order  $q$ ,  $0 < q \leq 2$ , based on the normalized slope of Hill numbers. Solid dots and triangles denote observed data points. All shaded areas in (a)–(d) denote 95% confidence bands obtained from a bootstrap method with 1000 replications. Some bands are invisible due to narrow widths. Numerical values for the three special cases of  $q = 0$ , 1, and 2 are shown in Table 1.

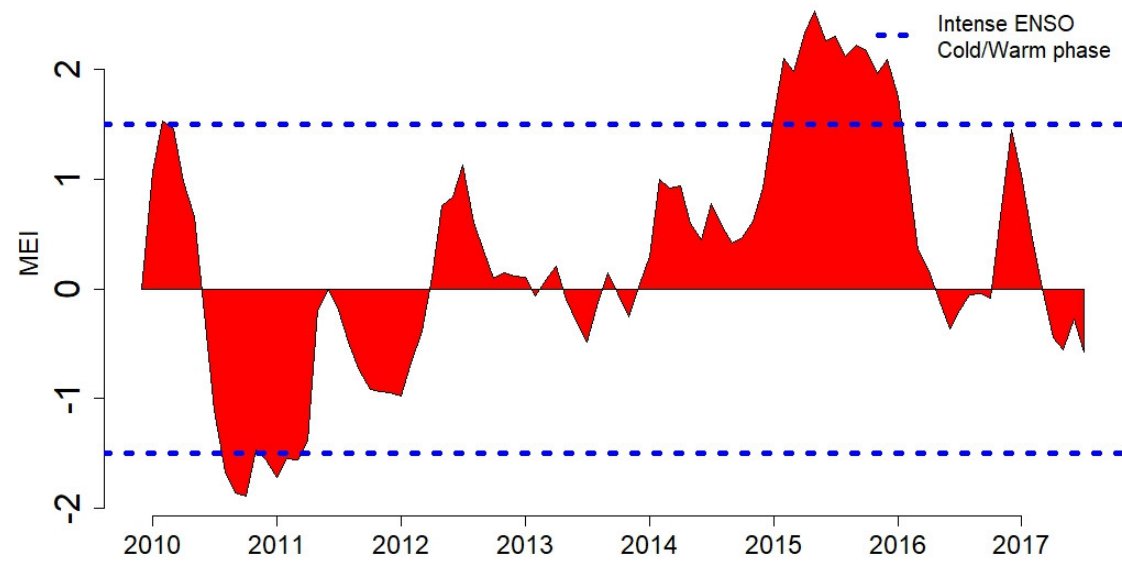

**Figure S2.** Multivariate index of the El Niño Southern oscillation for the years 2010-2017, values  $>+1.5$  are considered Niño Events, values  $<-1.5$  are considered Niña events.

**Table S1a.** Pairwise comparisons using permutational ANOVAs on a Bray–Curtis matrix. Significant p-values highlighted in red.

| (a)              |      | 2010  | 2011  | 2012  | 2013  | 2014  | 2015  | 2016 | 2017 |
|------------------|------|-------|-------|-------|-------|-------|-------|------|------|
| Marietas Islands | 2010 |       |       |       |       |       |       |      |      |
|                  | 2011 | 0.886 |       |       |       |       |       |      |      |
|                  | 2012 | 0.066 | 0.001 |       |       |       |       |      |      |
|                  | 2013 | 0.066 | 0.001 | 0.923 |       |       |       |      |      |
|                  | 2014 | 0.04  | 0.001 | 0.886 | 0.382 |       |       |      |      |
|                  | 2015 | 0.71  | 0.001 | 0.899 | 0.899 | 0.326 |       |      |      |
|                  | 2016 | 0.181 | 0.003 | 0.382 | 0.382 | 0.066 | 0.324 |      |      |
|                  | 2017 | 0.382 | 0.066 | 0.114 | 0.114 | 0.024 | 0.073 | 0.38 |      |

**Table S1b.** Pairwise comparisons using permutational MANOVAs on a Bray–Curtis matrix. p-values for Isabel Island (upper-right half), and Marietas Islands (lower-left half); significant p-values highlighted in red.

|                  |      | Isabel Island    |       |       |       |       |       |       |       |               |  |
|------------------|------|------------------|-------|-------|-------|-------|-------|-------|-------|---------------|--|
| (b)              |      | 2010             | 2011  | 2012  | 2013  | 2014  | 2015  | 2016  | 2017  |               |  |
| Marietas Islands | 2010 |                  | 0.59  | 0.21  | 0.03  | 0.395 | 0.009 | N/A   | 0.46  | Isabel Island |  |
|                  | 2011 | 0.57             |       | 0.015 | 0.008 | 0.63  | 0.002 | N/A   | 0.035 |               |  |
|                  | 2012 | 0.2              | 0.201 |       | 0.006 | 0.103 | 0.027 | N/A   | 0.03  |               |  |
|                  | 2013 | 0.16             | 0.5   | 0.665 |       | 0.069 | 0.035 | N/A   | 0.51  |               |  |
|                  | 2014 | 0.2              | 0.163 | 0.938 | 0.503 |       | 0.12  | N/A   | 0.23  |               |  |
|                  | 2015 | 0.2              | 0.108 | 0.724 | 0.268 | 0.503 |       | N/A   | 0.05  |               |  |
|                  | 2016 | 0.34             | 0.435 | 0.618 | 0.201 | 0.479 | 0.346 |       | N/A   |               |  |
|                  | 2017 | 0.34             | 0.008 | 0.1   | 0.003 | 0.1   | 0.003 | 0.005 |       |               |  |
|                  |      | Marietas Islands |       |       |       |       |       |       |       |               |  |

**Table S2a.** Individual contribution of each species to the paired comparisons of dissimilarity between the composition of the Marietas Island assemblage.

|                                     | 10-11 | 10-12 | 10-13 | 10-14 | 10-15 | 10-16 | 10-17 | 11-12 | 11-13 | 11-14 | 11-15 | 11-16 | 11-17 | 12-13 | 12-14 | 12-15 | 12-16 |
|-------------------------------------|-------|-------|-------|-------|-------|-------|-------|-------|-------|-------|-------|-------|-------|-------|-------|-------|-------|
| <i>Abudefduf declivifrons</i>       | 0.000 | 0.000 | 0.000 | 0.000 | 0.001 | 0.000 | 0.000 | 0.000 | 0.000 | 0.000 | 0.001 | 0.000 | 0.000 | 0.000 | 0.000 | 0.002 | 0.000 |
| <i>Abudefduf troschelii</i>         | 0.009 | 0.010 | 0.011 | 0.010 | 0.010 | 0.011 | 0.008 | 0.009 | 0.008 | 0.008 | 0.008 | 0.008 | 0.007 | 0.011 | 0.011 | 0.010 | 0.011 |
| <i>Acanthemblemaria macrospilus</i> | 0.000 | 0.000 | 0.000 | 0.000 | 0.000 | 0.000 | 0.000 | 0.000 | 0.000 | 0.000 | 0.000 | 0.000 | 0.000 | 0.000 | 0.000 | 0.000 | 0.000 |
| <i>Acanthurus nigricans</i>         | 0.000 | 0.000 | 0.000 | 0.000 | 0.000 | 0.000 | 0.000 | 0.000 | 0.000 | 0.000 | 0.000 | 0.000 | 0.000 | 0.000 | 0.000 | 0.000 | 0.000 |
| <i>Acanthurus triostegus</i>        | 0.000 | 0.000 | 0.000 | 0.000 | 0.000 | 0.000 | 0.000 | 0.000 | 0.000 | 0.000 | 0.000 | 0.000 | 0.000 | 0.000 | 0.000 | 0.000 | 0.000 |
| <i>Acanthurus xanthopterus</i>      | 0.006 | 0.004 | 0.010 | 0.003 | 0.003 | 0.007 | 0.005 | 0.008 | 0.012 | 0.007 | 0.007 | 0.009 | 0.008 | 0.013 | 0.004 | 0.004 | 0.009 |
| <i>Aetobatus narinari</i>           | 0.000 | 0.011 | 0.000 | 0.000 | 0.005 | 0.006 | 0.007 | 0.010 | 0.000 | 0.000 | 0.004 | 0.005 | 0.005 | 0.012 | 0.012 | 0.017 | 0.018 |
| <i>Alphestes immaculatus</i>        | 0.000 | 0.000 | 0.000 | 0.000 | 0.000 | 0.000 | 0.000 | 0.000 | 0.000 | 0.000 | 0.000 | 0.000 | 0.000 | 0.001 | 0.000 | 0.000 | 0.000 |
| <i>Aluterus scriptus</i>            | 0.000 | 0.000 | 0.000 | 0.000 | 0.000 | 0.000 | 0.000 | 0.000 | 0.000 | 0.000 | 0.000 | 0.000 | 0.000 | 0.000 | 0.000 | 0.000 | 0.000 |
| <i>Anisotremus interruptus</i>      | 0.007 | 0.007 | 0.004 | 0.006 | 0.003 | 0.007 | 0.003 | 0.008 | 0.007 | 0.008 | 0.005 | 0.008 | 0.005 | 0.007 | 0.009 | 0.005 | 0.009 |
| <i>Anisotremus taeniatus</i>        | 0.000 | 0.000 | 0.000 | 0.000 | 0.000 | 0.000 | 0.000 | 0.000 | 0.000 | 0.000 | 0.000 | 0.000 | 0.000 | 0.000 | 0.000 | 0.000 | 0.000 |
| <i>Apogon pacificus</i>             | 0.000 | 0.000 | 0.005 | 0.000 | 0.000 | 0.000 | 0.001 | 0.000 | 0.003 | 0.000 | 0.000 | 0.000 | 0.001 | 0.006 | 0.000 | 0.000 | 0.000 |
| <i>Apogon retrosella</i>            | 0.000 | 0.000 | 0.000 | 0.000 | 0.000 | 0.000 | 0.000 | 0.000 | 0.000 | 0.000 | 0.000 | 0.000 | 0.000 | 0.000 | 0.000 | 0.000 | 0.000 |
| <i>Arothron hispidus</i>            | 0.004 | 0.004 | 0.002 | 0.002 | 0.002 | 0.002 | 0.003 | 0.005 | 0.003 | 0.003 | 0.003 | 0.004 | 0.004 | 0.003 | 0.003 | 0.003 | 0.003 |
| <i>Arothron meleagris</i>           | 0.005 | 0.006 | 0.005 | 0.006 | 0.005 | 0.005 | 0.005 | 0.005 | 0.004 | 0.004 | 0.004 | 0.004 | 0.004 | 0.005 | 0.006 | 0.005 | 0.005 |
| <i>Balistes polylepis</i>           | 0.004 | 0.001 | 0.006 | 0.002 | 0.000 | 0.001 | 0.002 | 0.005 | 0.008 | 0.006 | 0.005 | 0.005 | 0.005 | 0.007 | 0.003 | 0.001 | 0.001 |
| <i>Bathygobius soporator</i>        | 0.000 | 0.000 | 0.000 | 0.000 | 0.000 | 0.000 | 0.000 | 0.000 | 0.000 | 0.000 | 0.000 | 0.000 | 0.000 | 0.000 | 0.001 | 0.000 | 0.000 |
| <i>Bodianus diplotaenia</i>         | 0.009 | 0.011 | 0.010 | 0.010 | 0.009 | 0.009 | 0.008 | 0.007 | 0.006 | 0.007 | 0.006 | 0.006 | 0.006 | 0.005 | 0.006 | 0.005 | 0.005 |
| <i>Bothus mancus</i>                | 0.001 | 0.000 | 0.000 | 0.000 | 0.000 | 0.000 | 0.000 | 0.001 | 0.001 | 0.001 | 0.001 | 0.001 | 0.001 | 0.000 | 0.000 | 0.000 | 0.000 |
| <i>Calamus brachysomus</i>          | 0.013 | 0.000 | 0.002 | 0.001 | 0.000 | 0.004 | 0.004 | 0.014 | 0.016 | 0.015 | 0.014 | 0.017 | 0.017 | 0.002 | 0.001 | 0.000 | 0.005 |
| <i>Cantherines dumerilii</i>        | 0.000 | 0.001 | 0.004 | 0.004 | 0.004 | 0.004 | 0.003 | 0.001 | 0.003 | 0.003 | 0.003 | 0.003 | 0.002 | 0.005 | 0.006 | 0.005 | 0.005 |
| <i>Canthigaster punctatissima</i>   | 0.000 | 0.000 | 0.000 | 0.000 | 0.000 | 0.000 | 0.000 | 0.000 | 0.000 | 0.000 | 0.000 | 0.000 | 0.000 | 0.000 | 0.000 | 0.000 | 0.000 |
| <i>Caranx caballus</i>              | 0.024 | 0.018 | 0.019 | 0.016 | 0.031 | 0.015 | 0.021 | 0.023 | 0.023 | 0.021 | 0.032 | 0.020 | 0.024 | 0.015 | 0.011 | 0.031 | 0.011 |
| <i>Caranx caninus</i>               | 0.000 | 0.000 | 0.000 | 0.000 | 0.000 | 0.001 | 0.003 | 0.000 | 0.000 | 0.000 | 0.000 | 0.001 | 0.003 | 0.000 | 0.000 | 0.000 | 0.001 |
| <i>Caranx sexfasciatus</i>          | 0.003 | 0.001 | 0.001 | 0.001 | 0.002 | 0.015 | 0.001 | 0.002 | 0.002 | 0.002 | 0.003 | 0.014 | 0.002 | 0.000 | 0.000 | 0.002 | 0.017 |
| <i>Cephalopholis panamensis</i>     | 0.003 | 0.004 | 0.003 | 0.004 | 0.003 | 0.004 | 0.003 | 0.003 | 0.003 | 0.003 | 0.003 | 0.002 | 0.002 | 0.003 | 0.003 | 0.003 | 0.003 |
| <i>Chaetodipterus zonatus</i>       | 0.000 | 0.000 | 0.000 | 0.000 | 0.000 | 0.000 | 0.000 | 0.000 | 0.000 | 0.000 | 0.000 | 0.000 | 0.000 | 0.000 | 0.000 | 0.000 | 0.000 |
| <i>Chaetodon humeralis</i>          | 0.003 | 0.002 | 0.002 | 0.002 | 0.002 | 0.002 | 0.002 | 0.002 | 0.002 | 0.003 | 0.002 | 0.002 | 0.002 | 0.001 | 0.002 | 0.002 | 0.001 |
| <i>Chromis atrilobata</i>           | 0.014 | 0.021 | 0.015 | 0.016 | 0.015 | 0.015 | 0.020 | 0.011 | 0.010 | 0.010 | 0.010 | 0.010 | 0.012 | 0.012 | 0.013 | 0.011 | 0.011 |
| <i>Cirrhitichthys oxycephalus</i>   | 0.001 | 0.001 | 0.001 | 0.001 | 0.001 | 0.001 | 0.001 | 0.001 | 0.001 | 0.001 | 0.001 | 0.001 | 0.001 | 0.001 | 0.001 | 0.001 | 0.001 |
| <i>Cirrhitus rivulatus</i>          | 0.007 | 0.006 | 0.006 | 0.007 | 0.005 | 0.005 | 0.007 | 0.008 | 0.007 | 0.008 | 0.007 | 0.007 | 0.007 | 0.007 | 0.009 | 0.007 | 0.007 |
| <i>Crocodilichthys gracilis</i>     | 0.000 | 0.000 | 0.000 | 0.000 | 0.000 | 0.000 | 0.000 | 0.000 | 0.000 | 0.000 | 0.000 | 0.000 | 0.000 | 0.000 | 0.000 | 0.000 | 0.000 |
| <i>Dasyatis diptera</i>             | 0.000 | 0.000 | 0.000 | 0.000 | 0.000 | 0.002 | 0.000 | 0.000 | 0.000 | 0.000 | 0.000 | 0.001 | 0.000 | 0.000 | 0.000 | 0.000 | 0.002 |

Table S2a Cont...

|                                     |       |       |       |       |       |       |       |       |       |       |       |       |       |       |       |       |       |
|-------------------------------------|-------|-------|-------|-------|-------|-------|-------|-------|-------|-------|-------|-------|-------|-------|-------|-------|-------|
| <i>Decapterus macarellus</i>        | 0.000 | 0.000 | 0.000 | 0.000 | 0.000 | 0.003 | 0.000 | 0.000 | 0.000 | 0.000 | 0.000 | 0.002 | 0.000 | 0.000 | 0.000 | 0.000 | 0.003 |
| <i>Diodon holocanthus</i>           | 0.008 | 0.012 | 0.011 | 0.012 | 0.010 | 0.009 | 0.009 | 0.005 | 0.005 | 0.005 | 0.005 | 0.004 | 0.004 | 0.006 | 0.006 | 0.005 | 0.005 |
| <i>Diodon hystrix</i>               | 0.007 | 0.005 | 0.007 | 0.009 | 0.006 | 0.005 | 0.008 | 0.008 | 0.008 | 0.009 | 0.008 | 0.007 | 0.008 | 0.008 | 0.010 | 0.008 | 0.006 |
| <i>Echidna nebulosa</i>             | 0.000 | 0.000 | 0.000 | 0.000 | 0.000 | 0.000 | 0.000 | 0.000 | 0.000 | 0.000 | 0.000 | 0.000 | 0.000 | 0.000 | 0.000 | 0.000 | 0.000 |
| <i>Elacatinus puncticulatus</i>     | 0.000 | 0.000 | 0.000 | 0.000 | 0.000 | 0.000 | 0.000 | 0.000 | 0.000 | 0.000 | 0.000 | 0.000 | 0.000 | 0.000 | 0.000 | 0.000 | 0.000 |
| <i>Elacatinus sp</i>                | 0.000 | 0.000 | 0.000 | 0.000 | 0.000 | 0.000 | 0.000 | 0.000 | 0.000 | 0.000 | 0.000 | 0.000 | 0.000 | 0.000 | 0.000 | 0.000 | 0.000 |
| <i>Epinephelus labriformis</i>      | 0.016 | 0.029 | 0.026 | 0.030 | 0.028 | 0.024 | 0.023 | 0.012 | 0.013 | 0.014 | 0.015 | 0.012 | 0.011 | 0.009 | 0.009 | 0.009 | 0.007 |
| <i>Euthynnus lineatus</i>           | 0.000 | 0.000 | 0.000 | 0.000 | 0.000 | 0.004 | 0.002 | 0.000 | 0.000 | 0.000 | 0.000 | 0.003 | 0.002 | 0.000 | 0.000 | 0.000 | 0.005 |
| <i>Fistularia commersonii</i>       | 0.001 | 0.002 | 0.002 | 0.002 | 0.002 | 0.003 | 0.004 | 0.002 | 0.002 | 0.002 | 0.002 | 0.002 | 0.004 | 0.004 | 0.004 | 0.004 | 0.004 |
| <i>Ginglymostoma cirratum</i>       | 0.000 | 0.000 | 0.000 | 0.000 | 0.009 | 0.000 | 0.000 | 0.000 | 0.000 | 0.000 | 0.007 | 0.000 | 0.000 | 0.000 | 0.000 | 0.010 | 0.000 |
| <i>Gnathanodon speciosus</i>        | 0.000 | 0.000 | 0.000 | 0.000 | 0.000 | 0.001 | 0.000 | 0.000 | 0.000 | 0.000 | 0.000 | 0.001 | 0.000 | 0.000 | 0.000 | 0.000 | 0.001 |
| <i>Gymnomuraena zebra</i>           | 0.000 | 0.000 | 0.001 | 0.001 | 0.001 | 0.001 | 0.000 | 0.000 | 0.001 | 0.001 | 0.001 | 0.001 | 0.000 | 0.001 | 0.001 | 0.001 | 0.001 |
| <i>Gymnothorax castaneus</i>        | 0.018 | 0.013 | 0.015 | 0.012 | 0.012 | 0.015 | 0.007 | 0.024 | 0.024 | 0.023 | 0.022 | 0.021 | 0.019 | 0.023 | 0.020 | 0.019 | 0.020 |
| <i>Haemulon flaviguttatum</i>       | 0.044 | 0.047 | 0.051 | 0.044 | 0.042 | 0.050 | 0.034 | 0.034 | 0.038 | 0.032 | 0.031 | 0.039 | 0.025 | 0.037 | 0.024 | 0.024 | 0.037 |
| <i>Haemulon maculicauda</i>         | 0.055 | 0.065 | 0.060 | 0.064 | 0.062 | 0.059 | 0.062 | 0.036 | 0.033 | 0.035 | 0.035 | 0.034 | 0.039 | 0.023 | 0.023 | 0.028 | 0.026 |
| <i>Haemulon scudderi</i>            | 0.008 | 0.001 | 0.006 | 0.006 | 0.001 | 0.001 | 0.000 | 0.009 | 0.013 | 0.013 | 0.009 | 0.009 | 0.008 | 0.008 | 0.007 | 0.002 | 0.002 |
| <i>Haemulon sexfasciatum</i>        | 0.002 | 0.004 | 0.014 | 0.004 | 0.004 | 0.002 | 0.002 | 0.002 | 0.010 | 0.002 | 0.002 | 0.001 | 0.001 | 0.015 | 0.005 | 0.004 | 0.002 |
| <i>Haemulon steindachneri</i>       | 0.004 | 0.001 | 0.003 | 0.010 | 0.003 | 0.003 | 0.016 | 0.004 | 0.005 | 0.010 | 0.005 | 0.005 | 0.016 | 0.003 | 0.012 | 0.002 | 0.002 |
| <i>Halichoeres chierchiae</i>       | 0.002 | 0.002 | 0.002 | 0.002 | 0.002 | 0.002 | 0.001 | 0.001 | 0.001 | 0.001 | 0.001 | 0.001 | 0.001 | 0.001 | 0.001 | 0.001 | 0.001 |
| <i>Halichoeres dispilus</i>         | 0.002 | 0.003 | 0.002 | 0.002 | 0.002 | 0.002 | 0.002 | 0.003 | 0.002 | 0.003 | 0.002 | 0.003 | 0.002 | 0.002 | 0.003 | 0.002 | 0.002 |
| <i>Halichoeres nicholsi</i>         | 0.004 | 0.003 | 0.003 | 0.002 | 0.002 | 0.002 | 0.002 | 0.005 | 0.005 | 0.005 | 0.004 | 0.004 | 0.004 | 0.004 | 0.004 | 0.003 | 0.003 |
| <i>Halichoeres notospilus</i>       | 0.001 | 0.002 | 0.001 | 0.001 | 0.001 | 0.001 | 0.001 | 0.001 | 0.001 | 0.001 | 0.001 | 0.001 | 0.001 | 0.002 | 0.002 | 0.002 | 0.001 |
| <i>Heteropriacanthus cruentatus</i> | 0.000 | 0.000 | 0.001 | 0.001 | 0.001 | 0.001 | 0.001 | 0.001 | 0.001 | 0.001 | 0.001 | 0.001 | 0.001 | 0.001 | 0.001 | 0.002 | 0.001 |
| <i>Hippocampus ingens</i>           | 0.000 | 0.000 | 0.000 | 0.000 | 0.000 | 0.000 | 0.000 | 0.000 | 0.000 | 0.000 | 0.000 | 0.000 | 0.000 | 0.000 | 0.000 | 0.000 | 0.000 |
| <i>Holacanthus passer</i>           | 0.008 | 0.009 | 0.007 | 0.007 | 0.008 | 0.007 | 0.006 | 0.007 | 0.007 | 0.008 | 0.007 | 0.006 | 0.006 | 0.006 | 0.007 | 0.007 | 0.006 |
| <i>Hoplopagrus guntherii</i>        | 0.003 | 0.000 | 0.003 | 0.003 | 0.002 | 0.000 | 0.003 | 0.004 | 0.005 | 0.005 | 0.004 | 0.003 | 0.005 | 0.004 | 0.004 | 0.003 | 0.000 |
| <i>Johnrandallia nigrirostris</i>   | 0.002 | 0.002 | 0.005 | 0.003 | 0.002 | 0.003 | 0.001 | 0.003 | 0.004 | 0.003 | 0.002 | 0.003 | 0.002 | 0.006 | 0.004 | 0.003 | 0.004 |
| <i>Kyphosus analogus</i>            | 0.020 | 0.010 | 0.004 | 0.004 | 0.001 | 0.002 | 0.001 | 0.025 | 0.022 | 0.023 | 0.022 | 0.021 | 0.020 | 0.011 | 0.012 | 0.010 | 0.010 |
| <i>Kyphosus elegans</i>             | 0.008 | 0.014 | 0.012 | 0.003 | 0.006 | 0.006 | 0.004 | 0.016 | 0.014 | 0.010 | 0.011 | 0.010 | 0.009 | 0.021 | 0.017 | 0.017 | 0.016 |
| <i>Lutjanus argentiventris</i>      | 0.007 | 0.005 | 0.006 | 0.005 | 0.006 | 0.005 | 0.004 | 0.007 | 0.006 | 0.006 | 0.006 | 0.006 | 0.006 | 0.004 | 0.003 | 0.004 | 0.004 |
| <i>Lutjanus guttatus</i>            | 0.002 | 0.002 | 0.002 | 0.002 | 0.003 | 0.003 | 0.005 | 0.000 | 0.000 | 0.000 | 0.000 | 0.001 | 0.003 | 0.000 | 0.000 | 0.001 | 0.002 |
| <i>Lutjanus inermis</i>             | 0.001 | 0.001 | 0.002 | 0.001 | 0.001 | 0.001 | 0.001 | 0.000 | 0.001 | 0.000 | 0.000 | 0.000 | 0.001 | 0.001 | 0.000 | 0.000 | 0.000 |
| <i>Lutjanus novemfasciatus</i>      | 0.002 | 0.002 | 0.002 | 0.002 | 0.002 | 0.002 | 0.002 | 0.001 | 0.001 | 0.001 | 0.001 | 0.001 | 0.001 | 0.001 | 0.000 | 0.001 | 0.001 |
| <i>Lutjanus viridis</i>             | 0.000 | 0.000 | 0.003 | 0.003 | 0.000 | 0.002 | 0.000 | 0.000 | 0.002 | 0.002 | 0.000 | 0.001 | 0.000 | 0.003 | 0.003 | 0.000 | 0.002 |

Table S2a Cont...

|                                    |       |       |       |       |       |       |       |       |       |       |       |       |       |       |       |       |       |
|------------------------------------|-------|-------|-------|-------|-------|-------|-------|-------|-------|-------|-------|-------|-------|-------|-------|-------|-------|
| <i>Malaccoctenus ebisui</i>        | 0.000 | 0.000 | 0.000 | 0.000 | 0.000 | 0.000 | 0.000 | 0.000 | 0.000 | 0.000 | 0.000 | 0.000 | 0.000 | 0.000 | 0.000 | 0.000 | 0.000 |
| <i>Malaccoctenus hubbsi</i>        | 0.000 | 0.000 | 0.000 | 0.000 | 0.000 | 0.000 | 0.000 | 0.000 | 0.000 | 0.000 | 0.000 | 0.000 | 0.000 | 0.000 | 0.000 | 0.000 | 0.000 |
| <i>Microlepidotus brevipinnis</i>  | 0.001 | 0.000 | 0.000 | 0.003 | 0.000 | 0.001 | 0.033 | 0.001 | 0.001 | 0.003 | 0.001 | 0.001 | 0.029 | 0.000 | 0.004 | 0.000 | 0.001 |
| <i>Microspathodon bairdii</i>      | 0.001 | 0.001 | 0.001 | 0.001 | 0.001 | 0.001 | 0.001 | 0.001 | 0.001 | 0.001 | 0.001 | 0.002 | 0.001 | 0.001 | 0.001 | 0.001 | 0.002 |
| <i>Microspathodon dorsalis</i>     | 0.052 | 0.063 | 0.064 | 0.061 | 0.057 | 0.055 | 0.050 | 0.046 | 0.042 | 0.043 | 0.039 | 0.037 | 0.037 | 0.051 | 0.041 | 0.039 | 0.041 |
| <i>Mulloidichthys dentatus</i>     | 0.077 | 0.089 | 0.088 | 0.095 | 0.084 | 0.082 | 0.122 | 0.027 | 0.029 | 0.032 | 0.026 | 0.025 | 0.068 | 0.024 | 0.030 | 0.019 | 0.019 |
| <i>Muraena argus</i>               | 0.000 | 0.002 | 0.000 | 0.000 | 0.000 | 0.000 | 0.000 | 0.001 | 0.000 | 0.000 | 0.000 | 0.000 | 0.000 | 0.002 | 0.002 | 0.002 | 0.002 |
| <i>Muraena lentiginosa</i>         | 0.000 | 0.000 | 0.000 | 0.000 | 0.000 | 0.000 | 0.000 | 0.000 | 0.000 | 0.000 | 0.000 | 0.000 | 0.000 | 0.000 | 0.000 | 0.000 | 0.000 |
| <i>Mycteroperca rosacea</i>        | 0.002 | 0.000 | 0.000 | 0.000 | 0.000 | 0.000 | 0.000 | 0.002 | 0.002 | 0.002 | 0.002 | 0.002 | 0.002 | 0.000 | 0.000 | 0.000 | 0.000 |
| <i>Myrichthys tigrinus</i>         | 0.000 | 0.000 | 0.000 | 0.000 | 0.000 | 0.000 | 0.000 | 0.000 | 0.000 | 0.000 | 0.000 | 0.000 | 0.000 | 0.000 | 0.000 | 0.000 | 0.000 |
| <i>Myripristis leiognathus</i>     | 0.004 | 0.003 | 0.007 | 0.008 | 0.003 | 0.004 | 0.003 | 0.005 | 0.007 | 0.007 | 0.005 | 0.005 | 0.004 | 0.009 | 0.009 | 0.004 | 0.005 |
| <i>Narcine entemedor</i>           | 0.000 | 0.000 | 0.000 | 0.000 | 0.000 | 0.000 | 0.000 | 0.000 | 0.000 | 0.000 | 0.000 | 0.000 | 0.000 | 0.000 | 0.000 | 0.000 | 0.000 |
| <i>Nicholsina denticulata</i>      | 0.000 | 0.001 | 0.000 | 0.000 | 0.000 | 0.000 | 0.000 | 0.001 | 0.000 | 0.000 | 0.000 | 0.000 | 0.000 | 0.001 | 0.001 | 0.001 | 0.001 |
| <i>Novaculichthys taeniourus</i>   | 0.000 | 0.000 | 0.000 | 0.000 | 0.000 | 0.000 | 0.000 | 0.000 | 0.000 | 0.000 | 0.000 | 0.000 | 0.000 | 0.000 | 0.000 | 0.000 | 0.000 |
| <i>Ophioblennius steindachneri</i> | 0.002 | 0.003 | 0.003 | 0.002 | 0.002 | 0.002 | 0.002 | 0.001 | 0.001 | 0.001 | 0.001 | 0.001 | 0.001 | 0.002 | 0.002 | 0.001 | 0.001 |
| <i>Ostracion meleagris</i>         | 0.000 | 0.000 | 0.000 | 0.000 | 0.000 | 0.000 | 0.000 | 0.000 | 0.000 | 0.000 | 0.000 | 0.000 | 0.000 | 0.000 | 0.001 | 0.000 | 0.000 |
| <i>Paranthias colonus</i>          | 0.003 | 0.002 | 0.004 | 0.005 | 0.009 | 0.014 | 0.020 | 0.003 | 0.005 | 0.005 | 0.008 | 0.012 | 0.015 | 0.004 | 0.005 | 0.010 | 0.017 |
| <i>Parapsettus panamensis</i>      | 0.000 | 0.000 | 0.000 | 0.000 | 0.000 | 0.000 | 0.000 | 0.000 | 0.000 | 0.000 | 0.000 | 0.000 | 0.000 | 0.000 | 0.000 | 0.000 | 0.000 |
| <i>Pareques fuscovittatus</i>      | 0.000 | 0.000 | 0.000 | 0.000 | 0.000 | 0.000 | 0.000 | 0.000 | 0.000 | 0.000 | 0.000 | 0.000 | 0.000 | 0.000 | 0.000 | 0.000 | 0.000 |
| <i>Plagiotremus azaleus</i>        | 0.000 | 0.000 | 0.000 | 0.000 | 0.000 | 0.000 | 0.000 | 0.000 | 0.000 | 0.000 | 0.000 | 0.000 | 0.000 | 0.000 | 0.000 | 0.000 | 0.000 |
| <i>Pomacanthus zonipectus</i>      | 0.001 | 0.001 | 0.001 | 0.000 | 0.001 | 0.000 | 0.000 | 0.001 | 0.001 | 0.001 | 0.001 | 0.001 | 0.001 | 0.001 | 0.001 | 0.001 | 0.001 |
| <i>Prionurus laticlavus</i>        | 0.000 | 0.000 | 0.000 | 0.000 | 0.000 | 0.000 | 0.001 | 0.000 | 0.000 | 0.000 | 0.000 | 0.000 | 0.001 | 0.000 | 0.000 | 0.000 | 0.000 |
| <i>Prionurus punctatus</i>         | 0.162 | 0.171 | 0.156 | 0.181 | 0.179 | 0.186 | 0.144 | 0.128 | 0.114 | 0.134 | 0.119 | 0.124 | 0.102 | 0.119 | 0.150 | 0.141 | 0.149 |
| <i>Pseudobalistes naufragium</i>   | 0.034 | 0.035 | 0.030 | 0.029 | 0.030 | 0.026 | 0.028 | 0.035 | 0.031 | 0.033 | 0.031 | 0.029 | 0.029 | 0.027 | 0.028 | 0.027 | 0.024 |
| <i>Rhinobatos productus</i>        | 0.001 | 0.000 | 0.000 | 0.000 | 0.000 | 0.000 | 0.000 | 0.001 | 0.001 | 0.001 | 0.001 | 0.001 | 0.001 | 0.000 | 0.000 | 0.000 | 0.000 |
| <i>Rypticus bicolor</i>            | 0.000 | 0.000 | 0.000 | 0.000 | 0.000 | 0.000 | 0.000 | 0.000 | 0.000 | 0.000 | 0.000 | 0.000 | 0.000 | 0.000 | 0.000 | 0.000 | 0.000 |
| <i>Sargocentron suborbitalis</i>   | 0.005 | 0.004 | 0.004 | 0.005 | 0.004 | 0.004 | 0.003 | 0.006 | 0.005 | 0.006 | 0.005 | 0.005 | 0.005 | 0.005 | 0.005 | 0.005 | 0.004 |
| <i>Scarus ghoban</i>               | 0.000 | 0.000 | 0.001 | 0.002 | 0.001 | 0.002 | 0.000 | 0.000 | 0.001 | 0.001 | 0.001 | 0.001 | 0.000 | 0.002 | 0.002 | 0.001 | 0.002 |
| <i>Scarus perrico</i>              | 0.026 | 0.011 | 0.009 | 0.007 | 0.015 | 0.016 | 0.015 | 0.029 | 0.027 | 0.028 | 0.029 | 0.028 | 0.027 | 0.012 | 0.012 | 0.017 | 0.018 |
| <i>Scarus rubroviolaceus</i>       | 0.003 | 0.003 | 0.002 | 0.006 | 0.002 | 0.004 | 0.002 | 0.003 | 0.002 | 0.005 | 0.003 | 0.004 | 0.002 | 0.002 | 0.007 | 0.003 | 0.004 |
| <i>Scomberomorus sierra</i>        | 0.000 | 0.000 | 0.000 | 0.000 | 0.000 | 0.000 | 0.000 | 0.000 | 0.000 | 0.000 | 0.000 | 0.000 | 0.000 | 0.000 | 0.000 | 0.001 | 0.000 |
| <i>Scorpaena mystes</i>            | 0.002 | 0.000 | 0.001 | 0.001 | 0.001 | 0.000 | 0.001 | 0.002 | 0.003 | 0.003 | 0.003 | 0.002 | 0.002 | 0.002 | 0.002 | 0.002 | 0.000 |
| <i>Scorpaenodes xyris</i>          | 0.000 | 0.000 | 0.000 | 0.000 | 0.000 | 0.000 | 0.000 | 0.000 | 0.000 | 0.000 | 0.000 | 0.000 | 0.000 | 0.000 | 0.000 | 0.000 | 0.000 |
| <i>Sectator ocyurus</i>            | 0.001 | 0.000 | 0.000 | 0.000 | 0.000 | 0.004 | 0.000 | 0.001 | 0.001 | 0.001 | 0.001 | 0.003 | 0.001 | 0.000 | 0.000 | 0.000 | 0.004 |

Table S2a Cont...

|                                |       |       |       |       |       |       |       |       |       |       |       |       |       |       |       |       |       |
|--------------------------------|-------|-------|-------|-------|-------|-------|-------|-------|-------|-------|-------|-------|-------|-------|-------|-------|-------|
| <i>Selene brevoortii</i>       | 0.000 | 0.000 | 0.003 | 0.000 | 0.033 | 0.000 | 0.000 | 0.000 | 0.002 | 0.000 | 0.027 | 0.000 | 0.000 | 0.003 | 0.000 | 0.039 | 0.000 |
| <i>Seriola rivoliana</i>       | 0.000 | 0.000 | 0.000 | 0.000 | 0.000 | 0.000 | 0.002 | 0.000 | 0.000 | 0.000 | 0.000 | 0.000 | 0.002 | 0.000 | 0.000 | 0.000 | 0.000 |
| <i>Serranus psittacinus</i>    | 0.000 | 0.000 | 0.000 | 0.000 | 0.000 | 0.000 | 0.000 | 0.000 | 0.000 | 0.000 | 0.000 | 0.000 | 0.000 | 0.000 | 0.000 | 0.000 | 0.000 |
| <i>Sphoeroides lobatus</i>     | 0.000 | 0.000 | 0.000 | 0.001 | 0.000 | 0.000 | 0.000 | 0.000 | 0.000 | 0.000 | 0.000 | 0.000 | 0.000 | 0.000 | 0.001 | 0.000 | 0.000 |
| <i>Stegastes acapulcoensis</i> | 0.020 | 0.025 | 0.022 | 0.025 | 0.022 | 0.021 | 0.020 | 0.020 | 0.017 | 0.018 | 0.017 | 0.016 | 0.016 | 0.016 | 0.018 | 0.015 | 0.016 |
| <i>Stegastes flavilatus</i>    | 0.003 | 0.005 | 0.004 | 0.004 | 0.004 | 0.003 | 0.003 | 0.003 | 0.002 | 0.002 | 0.002 | 0.002 | 0.002 | 0.002 | 0.004 | 0.004 | 0.004 |
| <i>Stethojulis bandanensis</i> | 0.000 | 0.000 | 0.000 | 0.000 | 0.000 | 0.000 | 0.000 | 0.000 | 0.000 | 0.000 | 0.000 | 0.000 | 0.000 | 0.000 | 0.000 | 0.000 | 0.000 |
| <i>Sufflamen verres</i>        | 0.008 | 0.007 | 0.006 | 0.007 | 0.007 | 0.006 | 0.006 | 0.009 | 0.008 | 0.009 | 0.009 | 0.008 | 0.008 | 0.006 | 0.007 | 0.007 | 0.006 |
| <i>Synodus lacertinus</i>      | 0.000 | 0.000 | 0.001 | 0.000 | 0.000 | 0.000 | 0.000 | 0.000 | 0.000 | 0.000 | 0.000 | 0.000 | 0.000 | 0.001 | 0.000 | 0.000 | 0.000 |
| <i>Thalassoma grammaticum</i>  | 0.001 | 0.001 | 0.001 | 0.001 | 0.001 | 0.001 | 0.001 | 0.000 | 0.000 | 0.000 | 0.000 | 0.000 | 0.000 | 0.000 | 0.000 | 0.000 | 0.000 |
| <i>Thalassoma lucasanum</i>    | 0.005 | 0.008 | 0.007 | 0.007 | 0.006 | 0.006 | 0.006 | 0.004 | 0.004 | 0.005 | 0.004 | 0.004 | 0.004 | 0.005 | 0.005 | 0.004 | 0.004 |
| <i>Tomicodon zebra</i>         | 0.000 | 0.000 | 0.000 | 0.000 | 0.000 | 0.000 | 0.000 | 0.000 | 0.000 | 0.000 | 0.000 | 0.000 | 0.000 | 0.000 | 0.000 | 0.000 | 0.000 |
| <i>Trachinotus rhodopus</i>    | 0.006 | 0.000 | 0.000 | 0.000 | 0.000 | 0.000 | 0.000 | 0.007 | 0.007 | 0.007 | 0.007 | 0.006 | 0.006 | 0.000 | 0.000 | 0.000 | 0.000 |
| <i>Tylosurus fodiator</i>      | 0.000 | 0.000 | 0.000 | 0.000 | 0.000 | 0.000 | 0.005 | 0.000 | 0.000 | 0.000 | 0.000 | 0.000 | 0.004 | 0.000 | 0.000 | 0.000 | 0.000 |
| <i>Tylosurus pacificus</i>     | 0.000 | 0.000 | 0.000 | 0.001 | 0.000 | 0.000 | 0.000 | 0.000 | 0.000 | 0.001 | 0.000 | 0.000 | 0.000 | 0.000 | 0.001 | 0.000 | 0.000 |
| <i>Urobatis concentricus</i>   | 0.000 | 0.001 | 0.001 | 0.000 | 0.000 | 0.000 | 0.000 | 0.000 | 0.001 | 0.000 | 0.000 | 0.000 | 0.000 | 0.002 | 0.001 | 0.001 | 0.001 |
| <i>Urobatis halleri</i>        | 0.006 | 0.008 | 0.008 | 0.009 | 0.008 | 0.007 | 0.007 | 0.001 | 0.001 | 0.001 | 0.001 | 0.001 | 0.001 | 0.000 | 0.001 | 0.000 | 0.000 |
| <i>Urotrygon aspidura</i>      | 0.000 | 0.000 | 0.000 | 0.000 | 0.000 | 0.000 | 0.000 | 0.000 | 0.000 | 0.000 | 0.000 | 0.000 | 0.000 | 0.000 | 0.000 | 0.000 | 0.000 |
| <i>Zanclus cornutus</i>        | 0.009 | 0.011 | 0.010 | 0.012 | 0.010 | 0.010 | 0.011 | 0.005 | 0.005 | 0.005 | 0.005 | 0.005 | 0.005 | 0.005 | 0.006 | 0.005 | 0.005 |

Table S2a Cont....

|                                     | 12-17 | 13-14 | 13-15 | 13-16 | 13-17 | 14-15 | 14-16 | 14-17 | 15-16 | 15-17 | 16-17 |
|-------------------------------------|-------|-------|-------|-------|-------|-------|-------|-------|-------|-------|-------|
| <i>Abudefduf declivifrons</i>       | 0.000 | 0.000 | 0.002 | 0.000 | 0.000 | 0.002 | 0.000 | 0.000 | 0.001 | 0.001 | 0.000 |
| <i>Abudefduf troschelii</i>         | 0.008 | 0.011 | 0.010 | 0.011 | 0.009 | 0.009 | 0.011 | 0.008 | 0.010 | 0.007 | 0.009 |
| <i>Acanthemblemaria macrospilus</i> | 0.000 | 0.000 | 0.000 | 0.000 | 0.000 | 0.000 | 0.000 | 0.000 | 0.000 | 0.000 | 0.000 |
| <i>Acanthurus nigricans</i>         | 0.000 | 0.000 | 0.000 | 0.000 | 0.000 | 0.000 | 0.000 | 0.000 | 0.000 | 0.000 | 0.000 |
| <i>Acanthurus triostegus</i>        | 0.000 | 0.000 | 0.000 | 0.000 | 0.000 | 0.000 | 0.000 | 0.000 | 0.000 | 0.000 | 0.000 |
| <i>Acanthurus xanthopterus</i>      | 0.007 | 0.012 | 0.012 | 0.015 | 0.013 | 0.004 | 0.009 | 0.006 | 0.008 | 0.006 | 0.010 |
| <i>Aetobatus narinari</i>           | 0.019 | 0.000 | 0.005 | 0.006 | 0.007 | 0.006 | 0.007 | 0.008 | 0.011 | 0.012 | 0.012 |
| <i>Alphestes immaculatus</i>        | 0.000 | 0.001 | 0.000 | 0.000 | 0.000 | 0.000 | 0.000 | 0.000 | 0.000 | 0.000 | 0.000 |
| <i>Aluterus scriptus</i>            | 0.000 | 0.000 | 0.000 | 0.000 | 0.000 | 0.000 | 0.000 | 0.000 | 0.000 | 0.000 | 0.000 |
| <i>Anisotremus interruptus</i>      | 0.005 | 0.006 | 0.002 | 0.007 | 0.003 | 0.004 | 0.009 | 0.004 | 0.006 | 0.001 | 0.005 |
| <i>Anisotremus taeniatus</i>        | 0.000 | 0.000 | 0.000 | 0.000 | 0.000 | 0.000 | 0.000 | 0.000 | 0.000 | 0.000 | 0.000 |
| <i>Apogon pacificus</i>             | 0.001 | 0.006 | 0.005 | 0.005 | 0.005 | 0.000 | 0.001 | 0.001 | 0.000 | 0.001 | 0.001 |
| <i>Apogon retrosella</i>            | 0.000 | 0.000 | 0.000 | 0.000 | 0.000 | 0.000 | 0.000 | 0.000 | 0.000 | 0.000 | 0.000 |
| <i>Arothron hispidus</i>            | 0.004 | 0.000 | 0.001 | 0.002 | 0.002 | 0.001 | 0.001 | 0.002 | 0.002 | 0.003 | 0.003 |
| <i>Arothron meleagris</i>           | 0.005 | 0.004 | 0.004 | 0.004 | 0.004 | 0.004 | 0.004 | 0.004 | 0.004 | 0.004 | 0.004 |
| <i>Balistes polylepis</i>           | 0.003 | 0.008 | 0.006 | 0.006 | 0.006 | 0.002 | 0.002 | 0.003 | 0.001 | 0.002 | 0.002 |
| <i>Bathygobius soporator</i>        | 0.000 | 0.000 | 0.000 | 0.000 | 0.000 | 0.000 | 0.000 | 0.000 | 0.000 | 0.000 | 0.000 |
| <i>Bodianus diplotaenia</i>         | 0.005 | 0.004 | 0.004 | 0.004 | 0.003 | 0.004 | 0.004 | 0.003 | 0.003 | 0.003 | 0.003 |
| <i>Bothus mancus</i>                | 0.000 | 0.001 | 0.000 | 0.000 | 0.000 | 0.000 | 0.000 | 0.000 | 0.000 | 0.000 | 0.000 |
| <i>Calamus brachysomus</i>          | 0.005 | 0.003 | 0.002 | 0.006 | 0.007 | 0.001 | 0.006 | 0.006 | 0.004 | 0.005 | 0.008 |
| <i>Cantherines dumerilii</i>        | 0.004 | 0.007 | 0.007 | 0.007 | 0.006 | 0.007 | 0.008 | 0.006 | 0.007 | 0.006 | 0.006 |
| <i>Canthigaster punctatissima</i>   | 0.000 | 0.000 | 0.000 | 0.000 | 0.000 | 0.000 | 0.000 | 0.000 | 0.000 | 0.000 | 0.000 |
| <i>Caranx caballus</i>              | 0.019 | 0.012 | 0.030 | 0.011 | 0.018 | 0.028 | 0.008 | 0.016 | 0.025 | 0.031 | 0.015 |
| <i>Caranx caninus</i>               | 0.004 | 0.000 | 0.000 | 0.001 | 0.004 | 0.000 | 0.001 | 0.004 | 0.001 | 0.004 | 0.004 |
| <i>Caranx sexfasciatus</i>          | 0.000 | 0.000 | 0.002 | 0.016 | 0.000 | 0.002 | 0.017 | 0.000 | 0.017 | 0.002 | 0.014 |
| <i>Cephalopholis panamensis</i>     | 0.003 | 0.002 | 0.002 | 0.002 | 0.002 | 0.002 | 0.002 | 0.002 | 0.002 | 0.002 | 0.002 |
| <i>Chaetodipterus zonatus</i>       | 0.000 | 0.000 | 0.000 | 0.000 | 0.000 | 0.000 | 0.000 | 0.000 | 0.000 | 0.000 | 0.000 |
| <i>Chaetodon humeralis</i>          | 0.001 | 0.001 | 0.001 | 0.001 | 0.001 | 0.001 | 0.001 | 0.001 | 0.001 | 0.001 | 0.001 |
| <i>Chromis atrilobata</i>           | 0.015 | 0.006 | 0.007 | 0.008 | 0.014 | 0.007 | 0.008 | 0.015 | 0.008 | 0.014 | 0.012 |
| <i>Cirrhitichthys oxycephalus</i>   | 0.001 | 0.000 | 0.000 | 0.000 | 0.000 | 0.000 | 0.000 | 0.000 | 0.000 | 0.000 | 0.000 |
| <i>Cirrhitus rivulatus</i>          | 0.009 | 0.006 | 0.005 | 0.005 | 0.007 | 0.006 | 0.006 | 0.008 | 0.005 | 0.007 | 0.007 |
| <i>Crocodilichthys gracilis</i>     | 0.000 | 0.000 | 0.000 | 0.000 | 0.000 | 0.000 | 0.000 | 0.000 | 0.000 | 0.000 | 0.000 |
| <i>Dasyatis dipteira</i>            | 0.000 | 0.000 | 0.000 | 0.002 | 0.000 | 0.000 | 0.002 | 0.000 | 0.002 | 0.000 | 0.002 |

Table S2a Cont...

|                                     |       |       |       |       |       |       |       |       |       |       |       |
|-------------------------------------|-------|-------|-------|-------|-------|-------|-------|-------|-------|-------|-------|
| <i>Decapterus macarellus</i>        | 0.000 | 0.000 | 0.000 | 0.003 | 0.000 | 0.000 | 0.003 | 0.000 | 0.003 | 0.000 | 0.002 |
| <i>Diodon holocanthus</i>           | 0.004 | 0.006 | 0.005 | 0.004 | 0.004 | 0.004 | 0.004 | 0.004 | 0.003 | 0.003 | 0.003 |
| <i>Diodon hystrix</i>               | 0.009 | 0.009 | 0.008 | 0.007 | 0.009 | 0.009 | 0.008 | 0.010 | 0.007 | 0.009 | 0.008 |
| <i>Echidna nebulosa</i>             | 0.000 | 0.000 | 0.000 | 0.000 | 0.000 | 0.000 | 0.000 | 0.000 | 0.000 | 0.000 | 0.000 |
| <i>Elacatinus puncticulatus</i>     | 0.000 | 0.000 | 0.000 | 0.000 | 0.000 | 0.000 | 0.000 | 0.000 | 0.000 | 0.000 | 0.000 |
| <i>Elacatinus sp</i>                | 0.000 | 0.000 | 0.000 | 0.000 | 0.000 | 0.000 | 0.000 | 0.000 | 0.000 | 0.000 | 0.000 |
| <i>Epinephelus labriformis</i>      | 0.007 | 0.007 | 0.006 | 0.006 | 0.006 | 0.006 | 0.006 | 0.006 | 0.005 | 0.005 | 0.005 |
| <i>Euthynnus lineatus</i>           | 0.002 | 0.000 | 0.000 | 0.004 | 0.002 | 0.000 | 0.005 | 0.002 | 0.004 | 0.002 | 0.006 |
| <i>Fistularia commersonii</i>       | 0.006 | 0.003 | 0.003 | 0.003 | 0.005 | 0.004 | 0.003 | 0.005 | 0.003 | 0.005 | 0.004 |
| <i>Ginglymostoma cirratum</i>       | 0.000 | 0.000 | 0.010 | 0.000 | 0.000 | 0.010 | 0.000 | 0.000 | 0.009 | 0.009 | 0.000 |
| <i>Gnathanodon speciosus</i>        | 0.000 | 0.000 | 0.000 | 0.001 | 0.000 | 0.000 | 0.001 | 0.000 | 0.001 | 0.000 | 0.001 |
| <i>Gymnomuraena zebra</i>           | 0.000 | 0.001 | 0.001 | 0.001 | 0.001 | 0.001 | 0.001 | 0.001 | 0.001 | 0.001 | 0.001 |
| <i>Gymnothorax castaneus</i>        | 0.015 | 0.021 | 0.020 | 0.020 | 0.017 | 0.017 | 0.016 | 0.014 | 0.015 | 0.013 | 0.013 |
| <i>Haemulon flaviguttatum</i>       | 0.014 | 0.033 | 0.031 | 0.043 | 0.023 | 0.019 | 0.033 | 0.010 | 0.032 | 0.011 | 0.024 |
| <i>Haemulon maculicauda</i>         | 0.039 | 0.020 | 0.024 | 0.023 | 0.034 | 0.026 | 0.024 | 0.037 | 0.027 | 0.037 | 0.036 |
| <i>Haemulon scudderi</i>            | 0.001 | 0.013 | 0.008 | 0.007 | 0.007 | 0.007 | 0.006 | 0.006 | 0.002 | 0.001 | 0.001 |
| <i>Haemulon sexfasciatum</i>        | 0.002 | 0.016 | 0.015 | 0.013 | 0.012 | 0.005 | 0.003 | 0.002 | 0.003 | 0.002 | 0.000 |
| <i>Haemulon steindachneri</i>       | 0.018 | 0.012 | 0.004 | 0.003 | 0.018 | 0.011 | 0.010 | 0.024 | 0.003 | 0.018 | 0.017 |
| <i>Halichoeres chierchiae</i>       | 0.001 | 0.001 | 0.001 | 0.000 | 0.000 | 0.001 | 0.000 | 0.001 | 0.000 | 0.000 | 0.000 |
| <i>Halichoeres dispilus</i>         | 0.002 | 0.001 | 0.001 | 0.001 | 0.001 | 0.001 | 0.001 | 0.001 | 0.001 | 0.001 | 0.001 |
| <i>Halichoeres nicholsi</i>         | 0.003 | 0.003 | 0.003 | 0.002 | 0.003 | 0.002 | 0.002 | 0.002 | 0.002 | 0.002 | 0.002 |
| <i>Halichoeres notospilus</i>       | 0.001 | 0.001 | 0.001 | 0.001 | 0.001 | 0.001 | 0.001 | 0.001 | 0.001 | 0.001 | 0.001 |
| <i>Heteropriacanthus cruentatus</i> | 0.002 | 0.002 | 0.002 | 0.002 | 0.002 | 0.002 | 0.002 | 0.002 | 0.002 | 0.002 | 0.002 |
| <i>Hippocampus ingens</i>           | 0.000 | 0.000 | 0.000 | 0.000 | 0.000 | 0.000 | 0.000 | 0.000 | 0.000 | 0.000 | 0.000 |
| <i>Holacanthus passer</i>           | 0.006 | 0.005 | 0.006 | 0.005 | 0.005 | 0.007 | 0.005 | 0.005 | 0.006 | 0.006 | 0.005 |
| <i>Hoplopagrus guntherii</i>        | 0.004 | 0.007 | 0.005 | 0.003 | 0.006 | 0.006 | 0.003 | 0.006 | 0.002 | 0.005 | 0.003 |
| <i>Johnrandallia nigrirostris</i>   | 0.002 | 0.006 | 0.005 | 0.005 | 0.004 | 0.004 | 0.004 | 0.003 | 0.004 | 0.002 | 0.003 |
| <i>Kyphosus analogus</i>            | 0.009 | 0.005 | 0.003 | 0.004 | 0.003 | 0.003 | 0.004 | 0.003 | 0.001 | 0.000 | 0.001 |
| <i>Kyphosus elegans</i>             | 0.014 | 0.014 | 0.014 | 0.013 | 0.011 | 0.008 | 0.007 | 0.005 | 0.008 | 0.007 | 0.006 |
| <i>Lutjanus argentiventris</i>      | 0.003 | 0.004 | 0.004 | 0.004 | 0.004 | 0.004 | 0.003 | 0.003 | 0.004 | 0.004 | 0.003 |
| <i>Lutjanus guttatus</i>            | 0.004 | 0.000 | 0.001 | 0.001 | 0.004 | 0.001 | 0.002 | 0.004 | 0.002 | 0.004 | 0.004 |
| <i>Lutjanus inermis</i>             | 0.001 | 0.002 | 0.001 | 0.001 | 0.002 | 0.000 | 0.000 | 0.001 | 0.000 | 0.001 | 0.001 |
| <i>Lutjanus novemfasciatus</i>      | 0.001 | 0.001 | 0.001 | 0.001 | 0.001 | 0.001 | 0.001 | 0.001 | 0.001 | 0.001 | 0.001 |
| <i>Lutjanus viridis</i>             | 0.000 | 0.005 | 0.003 | 0.004 | 0.003 | 0.003 | 0.004 | 0.003 | 0.002 | 0.000 | 0.001 |

Table S2a Cont....

|                                    |       |       |       |       |       |       |       |       |       |       |       |
|------------------------------------|-------|-------|-------|-------|-------|-------|-------|-------|-------|-------|-------|
| <i>Malacoctenus ebisui</i>         | 0.000 | 0.000 | 0.000 | 0.000 | 0.000 | 0.000 | 0.000 | 0.000 | 0.000 | 0.000 | 0.000 |
| <i>Malacoctenus hubbsi</i>         | 0.000 | 0.000 | 0.000 | 0.000 | 0.000 | 0.000 | 0.000 | 0.000 | 0.000 | 0.000 | 0.000 |
| <i>Microlepidotus brevipinnis</i>  | 0.037 | 0.003 | 0.000 | 0.001 | 0.036 | 0.003 | 0.004 | 0.039 | 0.001 | 0.036 | 0.035 |
| <i>Microspathodon bairdii</i>      | 0.002 | 0.001 | 0.001 | 0.002 | 0.001 | 0.001 | 0.002 | 0.002 | 0.002 | 0.001 | 0.002 |
| <i>Microspathodon dorsalis</i>     | 0.034 | 0.043 | 0.040 | 0.040 | 0.037 | 0.031 | 0.034 | 0.027 | 0.032 | 0.027 | 0.030 |
| <i>Mulloidichthys dentatus</i>     | 0.084 | 0.032 | 0.022 | 0.023 | 0.081 | 0.027 | 0.027 | 0.089 | 0.018 | 0.079 | 0.074 |
| <i>Muraena argus</i>               | 0.002 | 0.000 | 0.000 | 0.000 | 0.000 | 0.000 | 0.000 | 0.000 | 0.000 | 0.000 | 0.000 |
| <i>Muraena lentiginosa</i>         | 0.000 | 0.000 | 0.000 | 0.000 | 0.000 | 0.000 | 0.000 | 0.000 | 0.000 | 0.000 | 0.000 |
| <i>Mycteroperca rosacea</i>        | 0.000 | 0.000 | 0.000 | 0.000 | 0.000 | 0.000 | 0.000 | 0.000 | 0.000 | 0.000 | 0.000 |
| <i>Myrichthys tigrinus</i>         | 0.000 | 0.000 | 0.000 | 0.000 | 0.000 | 0.000 | 0.000 | 0.000 | 0.000 | 0.000 | 0.000 |
| <i>Myripristis leiognathus</i>     | 0.004 | 0.010 | 0.007 | 0.007 | 0.007 | 0.008 | 0.008 | 0.008 | 0.004 | 0.004 | 0.004 |
| <i>Narcine entemedor</i>           | 0.000 | 0.000 | 0.000 | 0.000 | 0.000 | 0.000 | 0.000 | 0.000 | 0.000 | 0.000 | 0.000 |
| <i>Nicholsina denticulata</i>      | 0.001 | 0.001 | 0.000 | 0.000 | 0.000 | 0.000 | 0.000 | 0.000 | 0.000 | 0.000 | 0.000 |
| <i>Novaculichthys taeniourus</i>   | 0.000 | 0.000 | 0.000 | 0.000 | 0.000 | 0.000 | 0.000 | 0.000 | 0.000 | 0.000 | 0.000 |
| <i>Ophioblennius steindachneri</i> | 0.001 | 0.002 | 0.002 | 0.002 | 0.001 | 0.001 | 0.001 | 0.001 | 0.001 | 0.001 | 0.000 |
| <i>Ostracion meleagris</i>         | 0.000 | 0.001 | 0.000 | 0.000 | 0.000 | 0.001 | 0.001 | 0.001 | 0.000 | 0.000 | 0.000 |
| <i>Paranthias colonus</i>          | 0.023 | 0.006 | 0.010 | 0.015 | 0.020 | 0.011 | 0.017 | 0.022 | 0.016 | 0.020 | 0.020 |
| <i>Parapsettus panamensis</i>      | 0.000 | 0.000 | 0.000 | 0.000 | 0.000 | 0.000 | 0.000 | 0.000 | 0.000 | 0.000 | 0.000 |
| <i>Pareques fuscovittatus</i>      | 0.000 | 0.000 | 0.000 | 0.000 | 0.000 | 0.000 | 0.000 | 0.000 | 0.000 | 0.000 | 0.000 |
| <i>Plagiotremus azaleus</i>        | 0.000 | 0.000 | 0.000 | 0.000 | 0.000 | 0.000 | 0.000 | 0.000 | 0.000 | 0.000 | 0.000 |
| <i>Pomacanthus zonipectus</i>      | 0.001 | 0.001 | 0.001 | 0.001 | 0.001 | 0.001 | 0.000 | 0.000 | 0.001 | 0.001 | 0.000 |
| <i>Prionurus laticlavus</i>        | 0.001 | 0.000 | 0.000 | 0.000 | 0.001 | 0.000 | 0.000 | 0.001 | 0.000 | 0.001 | 0.001 |
| <i>Prionurus punctatus</i>         | 0.107 | 0.130 | 0.121 | 0.131 | 0.092 | 0.150 | 0.157 | 0.117 | 0.138 | 0.106 | 0.115 |
| <i>Pseudobalistes naufragium</i>   | 0.024 | 0.018 | 0.017 | 0.016 | 0.015 | 0.018 | 0.015 | 0.016 | 0.015 | 0.014 | 0.014 |
| <i>Rhinobatos productus</i>        | 0.000 | 0.000 | 0.000 | 0.000 | 0.000 | 0.000 | 0.000 | 0.000 | 0.000 | 0.000 | 0.000 |
| <i>Rypticus bicolor</i>            | 0.000 | 0.000 | 0.000 | 0.000 | 0.000 | 0.000 | 0.000 | 0.000 | 0.000 | 0.000 | 0.000 |
| <i>Sargocentron suborbitalis</i>   | 0.004 | 0.004 | 0.004 | 0.004 | 0.004 | 0.004 | 0.004 | 0.004 | 0.004 | 0.003 | 0.003 |
| <i>Scarus ghoban</i>               | 0.000 | 0.003 | 0.003 | 0.003 | 0.002 | 0.003 | 0.003 | 0.002 | 0.003 | 0.001 | 0.002 |
| <i>Scarus perrico</i>              | 0.018 | 0.009 | 0.014 | 0.015 | 0.015 | 0.016 | 0.017 | 0.016 | 0.018 | 0.019 | 0.019 |
| <i>Scarus rubroviolaceus</i>       | 0.002 | 0.005 | 0.001 | 0.003 | 0.001 | 0.006 | 0.007 | 0.005 | 0.004 | 0.002 | 0.003 |
| <i>Scomberomorus sierra</i>        | 0.000 | 0.000 | 0.001 | 0.000 | 0.000 | 0.000 | 0.000 | 0.000 | 0.000 | 0.001 | 0.000 |
| <i>Scorpaena mystes</i>            | 0.001 | 0.003 | 0.003 | 0.001 | 0.002 | 0.003 | 0.001 | 0.002 | 0.001 | 0.002 | 0.001 |
| <i>Scorpaenodes xyris</i>          | 0.000 | 0.000 | 0.000 | 0.000 | 0.000 | 0.000 | 0.000 | 0.000 | 0.000 | 0.000 | 0.000 |
| <i>Sectator ocyurus</i>            | 0.000 | 0.000 | 0.000 | 0.004 | 0.000 | 0.000 | 0.004 | 0.000 | 0.004 | 0.000 | 0.004 |

**Table S2a** Cont...

|                                |       |       |       |       |       |       |       |       |       |       |       |
|--------------------------------|-------|-------|-------|-------|-------|-------|-------|-------|-------|-------|-------|
| <i>Selene brevoortii</i>       | 0.000 | 0.003 | 0.038 | 0.002 | 0.002 | 0.039 | 0.000 | 0.000 | 0.034 | 0.033 | 0.000 |
| <i>Seriola rivoliana</i>       | 0.002 | 0.000 | 0.000 | 0.000 | 0.002 | 0.000 | 0.000 | 0.002 | 0.000 | 0.002 | 0.002 |
| <i>Serranus psittacinus</i>    | 0.000 | 0.000 | 0.000 | 0.000 | 0.000 | 0.000 | 0.000 | 0.000 | 0.000 | 0.000 | 0.000 |
| <i>Sphoeroides lobatus</i>     | 0.000 | 0.001 | 0.000 | 0.000 | 0.000 | 0.001 | 0.001 | 0.000 | 0.000 | 0.000 | 0.000 |
| <i>Stegastes acapulcoensis</i> | 0.015 | 0.013 | 0.012 | 0.012 | 0.012 | 0.013 | 0.013 | 0.013 | 0.012 | 0.012 | 0.012 |
| <i>Stegastes flavilatus</i>    | 0.004 | 0.002 | 0.002 | 0.002 | 0.002 | 0.002 | 0.002 | 0.002 | 0.002 | 0.002 | 0.002 |
| <i>Stethojulis bandanensis</i> | 0.000 | 0.000 | 0.000 | 0.000 | 0.000 | 0.000 | 0.000 | 0.000 | 0.000 | 0.000 | 0.000 |
| <i>Sufflamen verres</i>        | 0.006 | 0.005 | 0.005 | 0.005 | 0.004 | 0.006 | 0.005 | 0.004 | 0.005 | 0.005 | 0.004 |
| <i>Synodus lacertinus</i>      | 0.000 | 0.001 | 0.001 | 0.001 | 0.001 | 0.000 | 0.000 | 0.000 | 0.000 | 0.000 | 0.000 |
| <i>Thalassoma grammaticum</i>  | 0.000 | 0.000 | 0.000 | 0.000 | 0.000 | 0.000 | 0.000 | 0.000 | 0.000 | 0.000 | 0.000 |
| <i>Thalassoma lucasanum</i>    | 0.004 | 0.004 | 0.003 | 0.003 | 0.003 | 0.003 | 0.003 | 0.003 | 0.003 | 0.003 | 0.003 |
| <i>Tomicodon zebra</i>         | 0.000 | 0.000 | 0.000 | 0.000 | 0.000 | 0.000 | 0.000 | 0.000 | 0.000 | 0.000 | 0.000 |
| <i>Trachinotus rhodopus</i>    | 0.000 | 0.000 | 0.000 | 0.000 | 0.000 | 0.000 | 0.000 | 0.000 | 0.000 | 0.000 | 0.000 |
| <i>Tylosurus fodiator</i>      | 0.005 | 0.000 | 0.000 | 0.000 | 0.005 | 0.000 | 0.000 | 0.005 | 0.000 | 0.005 | 0.005 |
| <i>Tylosurus pacificus</i>     | 0.000 | 0.001 | 0.000 | 0.000 | 0.000 | 0.001 | 0.001 | 0.001 | 0.000 | 0.000 | 0.000 |
| <i>Urobatis concentricus</i>   | 0.001 | 0.001 | 0.001 | 0.001 | 0.001 | 0.000 | 0.000 | 0.000 | 0.000 | 0.000 | 0.000 |
| <i>Urobatis halleri</i>        | 0.000 | 0.001 | 0.000 | 0.000 | 0.000 | 0.001 | 0.001 | 0.001 | 0.000 | 0.000 | 0.000 |
| <i>Urotrygon aspidura</i>      | 0.000 | 0.000 | 0.000 | 0.000 | 0.000 | 0.000 | 0.000 | 0.000 | 0.000 | 0.000 | 0.000 |
| <i>Zanclus cornutus</i>        | 0.006 | 0.006 | 0.005 | 0.005 | 0.006 | 0.004 | 0.004 | 0.006 | 0.003 | 0.005 | 0.005 |

**Table S2b.** Individual contribution of each species to the paired comparisons of dissimilarity between the composition of the Isabel Island assemblage.

|                                     | 10-11 | 10-12 | 10-13 | 10-14 | 10-15 | 10-17 | 11-12 | 11-13 | 11-14 | 11-15 | 11-17 | 12-13 | 12-14 | 12-15 | 12-17 | 13-14 |
|-------------------------------------|-------|-------|-------|-------|-------|-------|-------|-------|-------|-------|-------|-------|-------|-------|-------|-------|
| <i>Abudefduf declivifrons</i>       | 0.000 | 0.000 | 0.000 | 0.000 | 0.000 | 0.000 | 0.000 | 0.000 | 0.000 | 0.000 | 0.000 | 0.000 | 0.000 | 0.000 | 0.000 | 0.000 |
| <i>Abudefduf troschelii</i>         | 0.022 | 0.026 | 0.024 | 0.035 | 0.024 | 0.038 | 0.019 | 0.017 | 0.018 | 0.016 | 0.020 | 0.021 | 0.024 | 0.019 | 0.026 | 0.021 |
| <i>Acanthemblemaria macrospilus</i> | 0.000 | 0.000 | 0.000 | 0.000 | 0.000 | 0.000 | 0.000 | 0.000 | 0.000 | 0.000 | 0.000 | 0.000 | 0.000 | 0.000 | 0.000 | 0.000 |
| <i>Acanthurus nigricans</i>         | 0.000 | 0.000 | 0.000 | 0.000 | 0.000 | 0.001 | 0.000 | 0.000 | 0.000 | 0.000 | 0.001 | 0.000 | 0.000 | 0.000 | 0.001 | 0.000 |
| <i>Acanthurus triostegus</i>        | 0.003 | 0.001 | 0.001 | 0.006 | 0.004 | 0.003 | 0.002 | 0.002 | 0.006 | 0.004 | 0.003 | 0.000 | 0.004 | 0.003 | 0.000 | 0.004 |
| <i>Acanthurus xanthopterus</i>      | 0.066 | 0.046 | 0.049 | 0.049 | 0.100 | 0.052 | 0.049 | 0.052 | 0.075 | 0.099 | 0.084 | 0.038 | 0.034 | 0.083 | 0.035 | 0.038 |
| <i>Aetobatus narinari</i>           | 0.000 | 0.000 | 0.014 | 0.000 | 0.000 | 0.000 | 0.000 | 0.013 | 0.000 | 0.000 | 0.000 | 0.012 | 0.000 | 0.000 | 0.000 | 0.017 |
| <i>Alphestes immaculatus</i>        | 0.000 | 0.000 | 0.000 | 0.000 | 0.000 | 0.000 | 0.000 | 0.000 | 0.000 | 0.000 | 0.000 | 0.000 | 0.000 | 0.000 | 0.000 | 0.000 |
| <i>Aluterus scriptus</i>            | 0.001 | 0.000 | 0.000 | 0.001 | 0.000 | 0.001 | 0.000 | 0.000 | 0.000 | 0.000 | 0.000 | 0.000 | 0.000 | 0.000 | 0.000 | 0.000 |
| <i>Anisotremus interruptus</i>      | 0.002 | 0.002 | 0.002 | 0.004 | 0.002 | 0.003 | 0.000 | 0.000 | 0.001 | 0.000 | 0.000 | 0.000 | 0.001 | 0.000 | 0.000 | 0.002 |
| <i>Anisotremus taeniatus</i>        | 0.000 | 0.001 | 0.000 | 0.000 | 0.000 | 0.000 | 0.001 | 0.000 | 0.000 | 0.000 | 0.000 | 0.001 | 0.001 | 0.001 | 0.001 | 0.000 |
| <i>Apogon retrosella</i>            | 0.000 | 0.000 | 0.000 | 0.000 | 0.000 | 0.000 | 0.000 | 0.000 | 0.000 | 0.000 | 0.000 | 0.000 | 0.000 | 0.000 | 0.000 | 0.000 |
| <i>Arothron hispidus</i>            | 0.002 | 0.002 | 0.001 | 0.002 | 0.001 | 0.002 | 0.001 | 0.001 | 0.001 | 0.000 | 0.001 | 0.001 | 0.002 | 0.001 | 0.002 | 0.001 |
| <i>Arothron meleagris</i>           | 0.004 | 0.005 | 0.003 | 0.003 | 0.001 | 0.002 | 0.006 | 0.004 | 0.007 | 0.003 | 0.007 | 0.005 | 0.007 | 0.004 | 0.007 | 0.004 |
| <i>Balistes polylepis</i>           | 0.000 | 0.000 | 0.000 | 0.000 | 0.000 | 0.000 | 0.000 | 0.000 | 0.000 | 0.000 | 0.000 | 0.000 | 0.000 | 0.000 | 0.000 | 0.000 |
| <i>Bodianus diplotaenia</i>         | 0.008 | 0.002 | 0.003 | 0.004 | 0.003 | 0.005 | 0.007 | 0.007 | 0.010 | 0.007 | 0.011 | 0.002 | 0.001 | 0.002 | 0.002 | 0.003 |
| <i>Cantherines dumerilii</i>        | 0.000 | 0.000 | 0.002 | 0.000 | 0.001 | 0.000 | 0.000 | 0.001 | 0.000 | 0.001 | 0.000 | 0.001 | 0.000 | 0.001 | 0.000 | 0.003 |
| <i>Canthigaster punctatissima</i>   | 0.000 | 0.000 | 0.000 | 0.000 | 0.000 | 0.000 | 0.000 | 0.000 | 0.000 | 0.000 | 0.000 | 0.000 | 0.000 | 0.000 | 0.000 | 0.000 |
| <i>Caranx caballus</i>              | 0.070 | 0.013 | 0.015 | 0.016 | 0.013 | 0.018 | 0.053 | 0.055 | 0.077 | 0.055 | 0.084 | 0.005 | 0.002 | 0.003 | 0.002 | 0.004 |
| <i>Caranx caninus</i>               | 0.025 | 0.024 | 0.031 | 0.028 | 0.024 | 0.029 | 0.000 | 0.007 | 0.000 | 0.000 | 0.000 | 0.006 | 0.000 | 0.000 | 0.000 | 0.008 |
| <i>Caranx melampygus</i>            | 0.000 | 0.000 | 0.001 | 0.001 | 0.000 | 0.000 | 0.000 | 0.000 | 0.001 | 0.000 | 0.000 | 0.000 | 0.001 | 0.000 | 0.000 | 0.001 |
| <i>Caranx sexfasciatus</i>          | 0.012 | 0.012 | 0.021 | 0.016 | 0.012 | 0.053 | 0.000 | 0.009 | 0.001 | 0.000 | 0.037 | 0.009 | 0.001 | 0.000 | 0.033 | 0.011 |
| <i>Cephalopholis panamensis</i>     | 0.002 | 0.002 | 0.002 | 0.003 | 0.002 | 0.002 | 0.002 | 0.002 | 0.002 | 0.002 | 0.002 | 0.002 | 0.002 | 0.002 | 0.002 | 0.002 |
| <i>Chaetodon humeralis</i>          | 0.002 | 0.002 | 0.002 | 0.001 | 0.001 | 0.001 | 0.002 | 0.002 | 0.003 | 0.002 | 0.003 | 0.002 | 0.003 | 0.001 | 0.003 | 0.002 |
| <i>Chromis atrilobata</i>           | 0.013 | 0.012 | 0.013 | 0.030 | 0.018 | 0.040 | 0.002 | 0.003 | 0.007 | 0.008 | 0.013 | 0.003 | 0.006 | 0.007 | 0.011 | 0.007 |
| <i>Cirrhitichthys oxycephalus</i>   | 0.001 | 0.000 | 0.000 | 0.000 | 0.001 | 0.000 | 0.001 | 0.001 | 0.001 | 0.001 | 0.001 | 0.000 | 0.000 | 0.001 | 0.000 | 0.000 |
| <i>Cirrhitus rivulatus</i>          | 0.001 | 0.001 | 0.001 | 0.001 | 0.001 | 0.002 | 0.000 | 0.000 | 0.000 | 0.000 | 0.000 | 0.000 | 0.000 | 0.000 | 0.000 | 0.000 |
| <i>Crocodilichthys gracilis</i>     | 0.000 | 0.000 | 0.000 | 0.000 | 0.000 | 0.000 | 0.000 | 0.000 | 0.000 | 0.000 | 0.000 | 0.000 | 0.000 | 0.000 | 0.000 | 0.000 |
| <i>Dasyatis longa</i>               | 0.000 | 0.000 | 0.008 | 0.000 | 0.000 | 0.000 | 0.000 | 0.007 | 0.000 | 0.000 | 0.000 | 0.006 | 0.000 | 0.000 | 0.000 | 0.011 |
| <i>Diodon holocanthus</i>           | 0.003 | 0.001 | 0.001 | 0.001 | 0.001 | 0.001 | 0.003 | 0.003 | 0.004 | 0.003 | 0.005 | 0.001 | 0.002 | 0.001 | 0.002 | 0.001 |
| <i>Diodon hystrix</i>               | 0.001 | 0.002 | 0.001 | 0.002 | 0.001 | 0.001 | 0.002 | 0.001 | 0.001 | 0.000 | 0.001 | 0.002 | 0.003 | 0.002 | 0.003 | 0.001 |
| <i>Echidna nebulosa</i>             | 0.000 | 0.000 | 0.000 | 0.000 | 0.000 | 0.000 | 0.000 | 0.000 | 0.000 | 0.000 | 0.000 | 0.000 | 0.000 | 0.000 | 0.000 | 0.000 |
| <i>Elacatinus punctulatus</i>       | 0.000 | 0.000 | 0.000 | 0.000 | 0.000 | 0.000 | 0.000 | 0.000 | 0.000 | 0.000 | 0.000 | 0.000 | 0.000 | 0.000 | 0.000 | 0.000 |
| <i>Elops affinis</i>                | 0.014 | 0.009 | 0.010 | 0.015 | 0.010 | 0.016 | 0.003 | 0.003 | 0.005 | 0.003 | 0.006 | 0.000 | 0.000 | 0.000 | 0.000 | 0.000 |

Table S2b Cont...

|                                    |       |       |       |       |       |       |       |       |       |       |       |       |       |       |       |       |
|------------------------------------|-------|-------|-------|-------|-------|-------|-------|-------|-------|-------|-------|-------|-------|-------|-------|-------|
| <i>Epinephelus labriformis</i>     | 0.011 | 0.006 | 0.006 | 0.008 | 0.007 | 0.008 | 0.010 | 0.009 | 0.016 | 0.010 | 0.018 | 0.006 | 0.006 | 0.007 | 0.006 | 0.007 |
| <i>Fistularia commersonii</i>      | 0.004 | 0.005 | 0.005 | 0.004 | 0.003 | 0.004 | 0.004 | 0.004 | 0.003 | 0.002 | 0.003 | 0.005 | 0.006 | 0.003 | 0.006 | 0.004 |
| <i>Gerres cinereus</i>             | 0.000 | 0.000 | 0.000 | 0.000 | 0.000 | 0.000 | 0.000 | 0.000 | 0.001 | 0.000 | 0.001 | 0.000 | 0.000 | 0.000 | 0.000 | 0.000 |
| <i>Gymnomuraena zebra</i>          | 0.000 | 0.000 | 0.000 | 0.000 | 0.000 | 0.000 | 0.000 | 0.000 | 0.000 | 0.000 | 0.000 | 0.000 | 0.000 | 0.000 | 0.000 | 0.000 |
| <i>Gymnothorax castaneus</i>       | 0.017 | 0.008 | 0.002 | 0.009 | 0.003 | 0.005 | 0.017 | 0.014 | 0.024 | 0.015 | 0.024 | 0.006 | 0.011 | 0.006 | 0.009 | 0.005 |
| <i>Haemulon flaviguttatum</i>      | 0.002 | 0.004 | 0.008 | 0.003 | 0.005 | 0.003 | 0.002 | 0.006 | 0.000 | 0.003 | 0.000 | 0.007 | 0.002 | 0.005 | 0.002 | 0.007 |
| <i>Haemulon maculicauda</i>        | 0.093 | 0.166 | 0.063 | 0.088 | 0.052 | 0.076 | 0.162 | 0.059 | 0.083 | 0.049 | 0.072 | 0.139 | 0.178 | 0.133 | 0.181 | 0.045 |
| <i>Haemulon scudderi</i>           | 0.002 | 0.001 | 0.010 | 0.001 | 0.000 | 0.000 | 0.002 | 0.011 | 0.003 | 0.001 | 0.002 | 0.010 | 0.003 | 0.001 | 0.002 | 0.014 |
| <i>Haemulon sexfasciatum</i>       | 0.008 | 0.006 | 0.004 | 0.004 | 0.004 | 0.004 | 0.007 | 0.006 | 0.008 | 0.006 | 0.009 | 0.004 | 0.005 | 0.004 | 0.005 | 0.002 |
| <i>Haemulon steindachneri</i>      | 0.017 | 0.029 | 0.010 | 0.009 | 0.008 | 0.010 | 0.027 | 0.010 | 0.011 | 0.008 | 0.012 | 0.020 | 0.030 | 0.020 | 0.033 | 0.003 |
| <i>Halichoeres chierchiae</i>      | 0.002 | 0.002 | 0.002 | 0.005 | 0.002 | 0.005 | 0.001 | 0.002 | 0.003 | 0.002 | 0.004 | 0.002 | 0.002 | 0.001 | 0.002 | 0.003 |
| <i>Halichoeres dispilus</i>        | 0.004 | 0.003 | 0.004 | 0.007 | 0.005 | 0.008 | 0.002 | 0.003 | 0.004 | 0.003 | 0.004 | 0.002 | 0.003 | 0.003 | 0.003 | 0.004 |
| <i>Halichoeres nicholsi</i>        | 0.004 | 0.004 | 0.003 | 0.003 | 0.002 | 0.005 | 0.004 | 0.003 | 0.004 | 0.003 | 0.005 | 0.003 | 0.004 | 0.003 | 0.005 | 0.003 |
| <i>Halichoeres notospilus</i>      | 0.001 | 0.001 | 0.001 | 0.001 | 0.001 | 0.001 | 0.001 | 0.001 | 0.001 | 0.001 | 0.001 | 0.001 | 0.001 | 0.001 | 0.001 | 0.001 |
| <i>Holacanthus passer</i>          | 0.005 | 0.003 | 0.004 | 0.005 | 0.005 | 0.005 | 0.004 | 0.005 | 0.006 | 0.005 | 0.007 | 0.003 | 0.001 | 0.003 | 0.002 | 0.004 |
| <i>Hoplopagrus guntherii</i>       | 0.004 | 0.004 | 0.004 | 0.007 | 0.004 | 0.009 | 0.001 | 0.002 | 0.001 | 0.001 | 0.002 | 0.002 | 0.001 | 0.001 | 0.002 | 0.002 |
| <i>Johnrandallia nigrirostris</i>  | 0.004 | 0.002 | 0.004 | 0.002 | 0.002 | 0.003 | 0.003 | 0.004 | 0.004 | 0.003 | 0.004 | 0.003 | 0.002 | 0.001 | 0.002 | 0.005 |
| <i>Kyphosus analogus</i>           | 0.003 | 0.005 | 0.002 | 0.002 | 0.004 | 0.003 | 0.004 | 0.002 | 0.002 | 0.004 | 0.003 | 0.003 | 0.004 | 0.005 | 0.004 | 0.001 |
| <i>Kyphosus elegans</i>            | 0.001 | 0.000 | 0.001 | 0.001 | 0.000 | 0.003 | 0.001 | 0.001 | 0.002 | 0.001 | 0.004 | 0.000 | 0.001 | 0.000 | 0.002 | 0.001 |
| <i>Lutjanus argentiventris</i>     | 0.037 | 0.046 | 0.031 | 0.033 | 0.031 | 0.039 | 0.047 | 0.032 | 0.037 | 0.031 | 0.041 | 0.041 | 0.040 | 0.041 | 0.047 | 0.027 |
| <i>Lutjanus guttatus</i>           | 0.004 | 0.027 | 0.003 | 0.004 | 0.004 | 0.004 | 0.024 | 0.002 | 0.002 | 0.002 | 0.002 | 0.022 | 0.035 | 0.023 | 0.039 | 0.001 |
| <i>Lutjanus inermis</i>            | 0.000 | 0.000 | 0.000 | 0.000 | 0.000 | 0.000 | 0.000 | 0.000 | 0.000 | 0.000 | 0.000 | 0.000 | 0.000 | 0.000 | 0.000 | 0.000 |
| <i>Lutjanus novemfasciatus</i>     | 0.001 | 0.000 | 0.001 | 0.002 | 0.000 | 0.000 | 0.001 | 0.002 | 0.003 | 0.001 | 0.001 | 0.001 | 0.001 | 0.000 | 0.000 | 0.003 |
| <i>Malacoctenus ebisui</i>         | 0.000 | 0.000 | 0.000 | 0.000 | 0.000 | 0.000 | 0.000 | 0.000 | 0.000 | 0.000 | 0.000 | 0.000 | 0.000 | 0.000 | 0.000 | 0.000 |
| <i>Malacoctenus hubbsi</i>         | 0.000 | 0.000 | 0.000 | 0.000 | 0.000 | 0.000 | 0.000 | 0.000 | 0.000 | 0.000 | 0.000 | 0.000 | 0.000 | 0.000 | 0.000 | 0.000 |
| <i>Microlepidotus brevipinnis</i>  | 0.000 | 0.000 | 0.001 | 0.000 | 0.000 | 0.000 | 0.000 | 0.001 | 0.000 | 0.000 | 0.000 | 0.001 | 0.000 | 0.000 | 0.000 | 0.001 |
| <i>Microspathodon bairdii</i>      | 0.001 | 0.001 | 0.001 | 0.000 | 0.000 | 0.001 | 0.001 | 0.001 | 0.001 | 0.001 | 0.002 | 0.001 | 0.001 | 0.000 | 0.001 | 0.001 |
| <i>Microspathodon dorsalis</i>     | 0.024 | 0.023 | 0.062 | 0.016 | 0.031 | 0.032 | 0.024 | 0.054 | 0.031 | 0.030 | 0.036 | 0.050 | 0.029 | 0.028 | 0.036 | 0.087 |
| <i>Mulloidichthys dentatus</i>     | 0.029 | 0.021 | 0.018 | 0.020 | 0.020 | 0.022 | 0.023 | 0.021 | 0.023 | 0.023 | 0.025 | 0.013 | 0.014 | 0.016 | 0.015 | 0.009 |
| <i>Mycteroperca rosacea</i>        | 0.000 | 0.002 | 0.000 | 0.000 | 0.000 | 0.000 | 0.002 | 0.000 | 0.000 | 0.000 | 0.000 | 0.002 | 0.002 | 0.002 | 0.002 | 0.000 |
| <i>Myripristis leiognathus</i>     | 0.000 | 0.000 | 0.000 | 0.000 | 0.001 | 0.000 | 0.000 | 0.000 | 0.000 | 0.001 | 0.000 | 0.000 | 0.000 | 0.001 | 0.000 | 0.000 |
| <i>Nicholsina denticulata</i>      | 0.000 | 0.000 | 0.000 | 0.000 | 0.000 | 0.000 | 0.000 | 0.000 | 0.000 | 0.000 | 0.000 | 0.000 | 0.000 | 0.000 | 0.000 | 0.000 |
| <i>Novaculichthys taeniourus</i>   | 0.000 | 0.000 | 0.000 | 0.000 | 0.000 | 0.000 | 0.000 | 0.000 | 0.000 | 0.000 | 0.000 | 0.000 | 0.000 | 0.000 | 0.000 | 0.000 |
| <i>Ophioblennius steindachneri</i> | 0.001 | 0.001 | 0.000 | 0.000 | 0.000 | 0.001 | 0.001 | 0.001 | 0.001 | 0.001 | 0.001 | 0.001 | 0.001 | 0.001 | 0.001 | 0.000 |
| <i>Ostracion meleagris</i>         | 0.000 | 0.000 | 0.000 | 0.000 | 0.000 | 0.000 | 0.000 | 0.000 | 0.000 | 0.000 | 0.000 | 0.000 | 0.000 | 0.000 | 0.000 | 0.000 |

**Tabla S2b** Cont...

|                                  |       |       |       |       |       |       |       |       |       |       |       |       |       |       |       |       |
|----------------------------------|-------|-------|-------|-------|-------|-------|-------|-------|-------|-------|-------|-------|-------|-------|-------|-------|
| <i>Paranthias colonus</i>        | 0.001 | 0.000 | 0.000 | 0.000 | 0.000 | 0.000 | 0.001 | 0.001 | 0.002 | 0.001 | 0.002 | 0.000 | 0.000 | 0.000 | 0.000 | 0.000 |
| <i>Pareques fuscovittatus</i>    | 0.000 | 0.000 | 0.000 | 0.000 | 0.000 | 0.000 | 0.000 | 0.000 | 0.000 | 0.000 | 0.000 | 0.000 | 0.000 | 0.000 | 0.000 | 0.000 |
| <i>Plagiotremus azaleus</i>      | 0.000 | 0.000 | 0.000 | 0.000 | 0.000 | 0.000 | 0.000 | 0.000 | 0.000 | 0.000 | 0.000 | 0.000 | 0.000 | 0.000 | 0.000 | 0.000 |
| <i>Pomacanthus zonipectus</i>    | 0.000 | 0.000 | 0.000 | 0.001 | 0.000 | 0.000 | 0.000 | 0.000 | 0.001 | 0.000 | 0.000 | 0.000 | 0.001 | 0.000 | 0.000 | 0.001 |
| <i>Pontinus vaughani</i>         | 0.000 | 0.000 | 0.000 | 0.000 | 0.001 | 0.000 | 0.000 | 0.000 | 0.000 | 0.001 | 0.000 | 0.000 | 0.000 | 0.001 | 0.000 | 0.000 |
| <i>Prionurus punctatus</i>       | 0.118 | 0.138 | 0.170 | 0.180 | 0.256 | 0.182 | 0.128 | 0.156 | 0.165 | 0.244 | 0.157 | 0.160 | 0.188 | 0.239 | 0.184 | 0.231 |
| <i>Pseudobalistes naufragium</i> | 0.018 | 0.017 | 0.016 | 0.019 | 0.016 | 0.021 | 0.016 | 0.016 | 0.015 | 0.015 | 0.016 | 0.015 | 0.012 | 0.014 | 0.013 | 0.014 |
| <i>Rypticus bicolor</i>          | 0.000 | 0.000 | 0.000 | 0.000 | 0.000 | 0.000 | 0.000 | 0.000 | 0.000 | 0.000 | 0.000 | 0.000 | 0.000 | 0.000 | 0.000 | 0.000 |
| <i>Sargocentron suborbitalis</i> | 0.002 | 0.003 | 0.004 | 0.001 | 0.002 | 0.003 | 0.004 | 0.004 | 0.002 | 0.003 | 0.004 | 0.004 | 0.004 | 0.004 | 0.006 | 0.005 |
| <i>Scarus compressus</i>         | 0.000 | 0.000 | 0.004 | 0.007 | 0.000 | 0.000 | 0.000 | 0.004 | 0.005 | 0.000 | 0.000 | 0.003 | 0.005 | 0.000 | 0.000 | 0.009 |
| <i>Scarus ghoban</i>             | 0.009 | 0.008 | 0.010 | 0.012 | 0.009 | 0.014 | 0.003 | 0.005 | 0.002 | 0.004 | 0.003 | 0.004 | 0.002 | 0.003 | 0.002 | 0.005 |
| <i>Scarus perrico</i>            | 0.051 | 0.045 | 0.038 | 0.043 | 0.043 | 0.048 | 0.044 | 0.037 | 0.057 | 0.040 | 0.061 | 0.035 | 0.044 | 0.038 | 0.048 | 0.029 |
| <i>Scarus rubroviolaceus</i>     | 0.036 | 0.026 | 0.039 | 0.036 | 0.030 | 0.038 | 0.023 | 0.035 | 0.032 | 0.028 | 0.034 | 0.028 | 0.017 | 0.019 | 0.016 | 0.040 |
| <i>Scorpaena mystes</i>          | 0.001 | 0.000 | 0.001 | 0.000 | 0.000 | 0.000 | 0.001 | 0.001 | 0.001 | 0.001 | 0.001 | 0.001 | 0.000 | 0.000 | 0.000 | 0.001 |
| <i>Scorpaenodes xyris</i>        | 0.000 | 0.000 | 0.000 | 0.000 | 0.000 | 0.000 | 0.000 | 0.000 | 0.000 | 0.000 | 0.000 | 0.000 | 0.001 | 0.000 | 0.001 | 0.000 |
| <i>Serranus psittacinus</i>      | 0.000 | 0.000 | 0.000 | 0.000 | 0.000 | 0.000 | 0.000 | 0.000 | 0.000 | 0.000 | 0.000 | 0.000 | 0.000 | 0.000 | 0.000 | 0.000 |
| <i>Sphoeroides lobatus</i>       | 0.000 | 0.000 | 0.000 | 0.000 | 0.000 | 0.000 | 0.000 | 0.000 | 0.000 | 0.000 | 0.000 | 0.000 | 0.000 | 0.000 | 0.000 | 0.000 |
| <i>Sphyraena ensis</i>           | 0.000 | 0.000 | 0.000 | 0.097 | 0.000 | 0.000 | 0.000 | 0.000 | 0.094 | 0.000 | 0.000 | 0.000 | 0.086 | 0.000 | 0.000 | 0.089 |
| <i>Stegastes acapulcoensis</i>   | 0.011 | 0.018 | 0.027 | 0.015 | 0.016 | 0.016 | 0.014 | 0.023 | 0.012 | 0.014 | 0.013 | 0.018 | 0.035 | 0.017 | 0.035 | 0.043 |
| <i>Stegastes baldwini</i>        | 0.000 | 0.000 | 0.000 | 0.000 | 0.000 | 0.001 | 0.000 | 0.000 | 0.000 | 0.000 | 0.001 | 0.000 | 0.000 | 0.000 | 0.000 | 0.000 |
| <i>Stegastes flavilatus</i>      | 0.006 | 0.008 | 0.006 | 0.008 | 0.004 | 0.007 | 0.006 | 0.006 | 0.009 | 0.005 | 0.011 | 0.005 | 0.012 | 0.006 | 0.016 | 0.009 |
| <i>Sufflamen verres</i>          | 0.002 | 0.003 | 0.007 | 0.009 | 0.009 | 0.005 | 0.002 | 0.006 | 0.006 | 0.007 | 0.002 | 0.005 | 0.006 | 0.007 | 0.002 | 0.010 |
| <i>Synodus lacertinus</i>        | 0.000 | 0.000 | 0.000 | 0.000 | 0.000 | 0.000 | 0.000 | 0.000 | 0.000 | 0.000 | 0.000 | 0.000 | 0.000 | 0.000 | 0.000 | 0.000 |
| <i>Thalassoma lucasanum</i>      | 0.006 | 0.005 | 0.009 | 0.009 | 0.008 | 0.011 | 0.004 | 0.008 | 0.006 | 0.007 | 0.008 | 0.007 | 0.004 | 0.005 | 0.005 | 0.013 |
| <i>Trachinotus rhodopus</i>      | 0.003 | 0.002 | 0.003 | 0.004 | 0.003 | 0.004 | 0.000 | 0.000 | 0.000 | 0.000 | 0.000 | 0.000 | 0.000 | 0.000 | 0.000 | 0.001 |
| <i>Tylosurus acus melanotus</i>  | 0.000 | 0.000 | 0.000 | 0.000 | 0.000 | 0.000 | 0.000 | 0.000 | 0.000 | 0.000 | 0.000 | 0.000 | 0.000 | 0.000 | 0.000 | 0.000 |
| <i>Urobatis concentricus</i>     | 0.000 | 0.007 | 0.000 | 0.000 | 0.000 | 0.000 | 0.006 | 0.000 | 0.000 | 0.000 | 0.000 | 0.006 | 0.008 | 0.006 | 0.009 | 0.000 |
| <i>Zanclus cornutus</i>          | 0.012 | 0.011 | 0.014 | 0.016 | 0.018 | 0.018 | 0.003 | 0.007 | 0.004 | 0.010 | 0.005 | 0.006 | 0.002 | 0.009 | 0.003 | 0.007 |

Table S2b Cont...

|                                     | 13-15 | 13-17 | 14-15 | 14-17 | 15-17 |
|-------------------------------------|-------|-------|-------|-------|-------|
| <i>Abudefduf declivifrons</i>       | 0.000 | 0.000 | 0.000 | 0.000 | 0.000 |
| <i>Abudefduf troschelii</i>         | 0.018 | 0.023 | 0.016 | 0.011 | 0.017 |
| <i>Acanthemblemaria macrospilus</i> | 0.000 | 0.000 | 0.000 | 0.000 | 0.000 |
| <i>Acanthurus nigricans</i>         | 0.000 | 0.001 | 0.000 | 0.001 | 0.001 |
| <i>Acanthurus triostegus</i>        | 0.003 | 0.001 | 0.007 | 0.006 | 0.004 |
| <i>Acanthurus xanthopterus</i>      | 0.087 | 0.042 | 0.110 | 0.011 | 0.119 |
| <i>Aetobatus narinari</i>           | 0.012 | 0.019 | 0.000 | 0.000 | 0.000 |
| <i>Alphestes immaculatus</i>        | 0.000 | 0.000 | 0.000 | 0.000 | 0.000 |
| <i>Aluterus scriptus</i>            | 0.000 | 0.000 | 0.000 | 0.000 | 0.000 |
| <i>Anisotremus interruptus</i>      | 0.001 | 0.000 | 0.002 | 0.004 | 0.000 |
| <i>Anisotremus taeniatus</i>        | 0.000 | 0.001 | 0.000 | 0.000 | 0.000 |
| <i>Apogon retrosella</i>            | 0.000 | 0.000 | 0.000 | 0.000 | 0.000 |
| <i>Arothron hispidus</i>            | 0.000 | 0.001 | 0.000 | 0.000 | 0.000 |
| <i>Arothron meleagris</i>           | 0.003 | 0.004 | 0.003 | 0.009 | 0.001 |
| <i>Balistes polylepis</i>           | 0.001 | 0.001 | 0.000 | 0.001 | 0.001 |
| <i>Bodianus diplotaenia</i>         | 0.002 | 0.004 | 0.003 | 0.002 | 0.003 |
| <i>Cantherines dumerilii</i>        | 0.002 | 0.003 | 0.001 | 0.000 | 0.001 |
| <i>Canthigaster punctatissima</i>   | 0.000 | 0.000 | 0.000 | 0.000 | 0.000 |
| <i>Caranx caballus</i>              | 0.004 | 0.005 | 0.002 | 0.000 | 0.002 |
| <i>Caranx caninus</i>               | 0.006 | 0.009 | 0.000 | 0.000 | 0.000 |
| <i>Caranx melampygus</i>            | 0.000 | 0.001 | 0.001 | 0.002 | 0.000 |
| <i>Caranx sexfasciatus</i>          | 0.009 | 0.044 | 0.001 | 0.048 | 0.034 |
| <i>Cephalopholis panamensis</i>     | 0.002 | 0.002 | 0.003 | 0.003 | 0.002 |
| <i>Chaetodon humeralis</i>          | 0.002 | 0.002 | 0.002 | 0.003 | 0.001 |
| <i>Chromis atrilobata</i>           | 0.008 | 0.014 | 0.015 | 0.042 | 0.021 |
| <i>Cirrhitichthys oxycephalus</i>   | 0.001 | 0.000 | 0.001 | 0.000 | 0.001 |
| <i>Cirrhitus rivulatus</i>          | 0.000 | 0.000 | 0.000 | 0.001 | 0.000 |
| <i>Crocodilichthys gracilis</i>     | 0.000 | 0.000 | 0.000 | 0.000 | 0.000 |
| <i>Dasyatis longa</i>               | 0.007 | 0.012 | 0.000 | 0.000 | 0.000 |
| <i>Diodon holocanthus</i>           | 0.001 | 0.001 | 0.001 | 0.000 | 0.001 |
| <i>Diodon hystrix</i>               | 0.000 | 0.001 | 0.000 | 0.000 | 0.000 |
| <i>Echidna nebulosa</i>             | 0.000 | 0.000 | 0.000 | 0.000 | 0.000 |
| <i>Elacatinus puncticulatus</i>     | 0.000 | 0.000 | 0.000 | 0.000 | 0.000 |
| <i>Elops affinis</i>                | 0.000 | 0.000 | 0.000 | 0.000 | 0.000 |

**Table S2b** Cont...

|                                     |       |       |       |       |       |
|-------------------------------------|-------|-------|-------|-------|-------|
| <i>Epinephelus labriformis</i>      | 0.007 | 0.008 | 0.011 | 0.005 | 0.012 |
| <i>Fistularia commersonii</i>       | 0.003 | 0.004 | 0.000 | 0.000 | 0.001 |
| <i>Gerres cinereus</i>              | 0.000 | 0.000 | 0.000 | 0.000 | 0.000 |
| <i>Gymnomuraena zebra</i>           | 0.000 | 0.000 | 0.000 | 0.000 | 0.000 |
| <i>Gymnothorax castaneus</i>        | 0.001 | 0.001 | 0.006 | 0.010 | 0.001 |
| <i>Haemulon flaviguttatum</i>       | 0.008 | 0.008 | 0.004 | 0.000 | 0.004 |
| <i>Haemulon maculicauda</i>         | 0.020 | 0.028 | 0.026 | 0.036 | 0.003 |
| <i>Haemulon scudderi</i>            | 0.009 | 0.014 | 0.001 | 0.002 | 0.000 |
| <i>Haemulon sexfasciatum</i>        | 0.003 | 0.002 | 0.002 | 0.002 | 0.002 |
| <i>Haemulon steindachneri</i>       | 0.002 | 0.003 | 0.000 | 0.000 | 0.000 |
| <i>Halichoeres chierchiae</i>       | 0.002 | 0.004 | 0.002 | 0.002 | 0.002 |
| <i>Halichoeres dispilus</i>         | 0.003 | 0.004 | 0.003 | 0.000 | 0.004 |
| <i>Halichoeres nicholsi</i>         | 0.002 | 0.004 | 0.001 | 0.007 | 0.003 |
| <i>Halichoeres notospilus</i>       | 0.001 | 0.001 | 0.001 | 0.000 | 0.001 |
| <i>Holacanthus passer</i>           | 0.004 | 0.005 | 0.005 | 0.001 | 0.005 |
| <i>Hoplopagrus guntherii</i>        | 0.001 | 0.003 | 0.000 | 0.005 | 0.001 |
| <i>Johnrandallia nigristrostris</i> | 0.003 | 0.005 | 0.002 | 0.001 | 0.002 |
| <i>Kyphosus analogus</i>            | 0.003 | 0.001 | 0.003 | 0.001 | 0.003 |
| <i>Kyphosus elegans</i>             | 0.001 | 0.003 | 0.001 | 0.008 | 0.003 |
| <i>Lutjanus argentiventris</i>      | 0.026 | 0.031 | 0.028 | 0.027 | 0.033 |
| <i>Lutjanus guttatus</i>            | 0.001 | 0.001 | 0.001 | 0.000 | 0.002 |
| <i>Lutjanus inermis</i>             | 0.000 | 0.000 | 0.000 | 0.000 | 0.000 |
| <i>Lutjanus novemfasciatus</i>      | 0.001 | 0.001 | 0.002 | 0.002 | 0.000 |
| <i>Malacoctenus ebisui</i>          | 0.000 | 0.000 | 0.000 | 0.000 | 0.000 |
| <i>Malacoctenus hubbsi</i>          | 0.000 | 0.000 | 0.000 | 0.000 | 0.000 |
| <i>Microlepidotus brevipinnis</i>   | 0.001 | 0.001 | 0.000 | 0.000 | 0.000 |
| <i>Microspathodon bairdii</i>       | 0.001 | 0.001 | 0.000 | 0.001 | 0.000 |
| <i>Microspathodon dorsalis</i>      | 0.053 | 0.089 | 0.043 | 0.068 | 0.053 |
| <i>Mulloidichthys dentatus</i>      | 0.013 | 0.009 | 0.011 | 0.001 | 0.011 |
| <i>Mycteroperca rosacea</i>         | 0.000 | 0.000 | 0.000 | 0.000 | 0.000 |
| <i>Myripristis leiognathus</i>      | 0.001 | 0.000 | 0.001 | 0.000 | 0.001 |
| <i>Nicholsina denticulata</i>       | 0.000 | 0.000 | 0.000 | 0.000 | 0.000 |
| <i>Novaculichthys taeniourus</i>    | 0.000 | 0.000 | 0.000 | 0.000 | 0.000 |
| <i>Ophioblennius steindachneri</i>  | 0.000 | 0.001 | 0.000 | 0.003 | 0.001 |
| <i>Ostracion meleagris</i>          | 0.000 | 0.000 | 0.000 | 0.000 | 0.000 |

**Table S2b** Cont...

|                                  |       |       |       |       |       |
|----------------------------------|-------|-------|-------|-------|-------|
| <i>Paranthias colonus</i>        | 0.000 | 0.000 | 0.000 | 0.000 | 0.000 |
| <i>Pareques fuscovittatus</i>    | 0.000 | 0.000 | 0.000 | 0.000 | 0.000 |
| <i>Plagiotremus azaleus</i>      | 0.000 | 0.000 | 0.000 | 0.000 | 0.000 |
| <i>Pomacanthus zonipectus</i>    | 0.000 | 0.000 | 0.001 | 0.002 | 0.000 |
| <i>Pontinus vaughani</i>         | 0.001 | 0.000 | 0.004 | 0.000 | 0.004 |
| <i>Prionurus punctatus</i>       | 0.254 | 0.226 | 0.331 | 0.316 | 0.343 |
| <i>Pseudobalistes naufragium</i> | 0.014 | 0.016 | 0.011 | 0.001 | 0.012 |
| <i>Rypticus bicolor</i>          | 0.000 | 0.000 | 0.000 | 0.000 | 0.000 |
| <i>Sargocentron suborbitalis</i> | 0.004 | 0.006 | 0.003 | 0.004 | 0.004 |
| <i>Scarus compressus</i>         | 0.004 | 0.005 | 0.007 | 0.020 | 0.000 |
| <i>Scarus ghoban</i>             | 0.005 | 0.005 | 0.002 | 0.000 | 0.003 |
| <i>Scarus perrico</i>            | 0.031 | 0.032 | 0.043 | 0.013 | 0.047 |
| <i>Scarus rubroviolaceus</i>     | 0.032 | 0.043 | 0.019 | 0.013 | 0.017 |
| <i>Scorpaena mystes</i>          | 0.001 | 0.001 | 0.000 | 0.000 | 0.000 |
| <i>Scorpaenodes xyris</i>        | 0.000 | 0.000 | 0.000 | 0.000 | 0.000 |
| <i>Serranus psittacinus</i>      | 0.000 | 0.000 | 0.000 | 0.000 | 0.000 |
| <i>Sphoeroides lobatus</i>       | 0.000 | 0.000 | 0.000 | 0.000 | 0.000 |
| <i>Sphyraena ensis</i>           | 0.000 | 0.000 | 0.088 | 0.126 | 0.000 |
| <i>Stegastes acapulcoensis</i>   | 0.024 | 0.044 | 0.021 | 0.010 | 0.023 |
| <i>Stegastes baldwini</i>        | 0.000 | 0.000 | 0.000 | 0.001 | 0.001 |
| <i>Stegastes flavilatus</i>      | 0.005 | 0.011 | 0.008 | 0.018 | 0.008 |
| <i>Sufflamen verres</i>          | 0.009 | 0.011 | 0.016 | 0.020 | 0.014 |
| <i>Synodus lacertinus</i>        | 0.000 | 0.000 | 0.000 | 0.000 | 0.000 |
| <i>Thalassoma lucasanum</i>      | 0.008 | 0.014 | 0.009 | 0.008 | 0.011 |
| <i>Trachinotus rhodopus</i>      | 0.000 | 0.001 | 0.000 | 0.000 | 0.000 |
| <i>Tylosurus acus melanotus</i>  | 0.000 | 0.000 | 0.000 | 0.000 | 0.000 |
| <i>Urobatis concentricus</i>     | 0.000 | 0.000 | 0.000 | 0.000 | 0.000 |
| <i>Zanclus cornutus</i>          | 0.012 | 0.009 | 0.017 | 0.003 | 0.019 |

**Table S3.** Results of the multiple linear regression of community indicators and the environmental variables. <sup>0</sup>D: Annual richness, <sup>1</sup>D: High abundance species, <sup>2</sup>D: Number of dominant species, Sst: Sea surface temperature, Pp: Primary productivity, Chl: Chlorophyll concentration. Bold letters represent significant p-values.

|                | <sup>0</sup> D | <sup>1</sup> D | <sup>2</sup> D | $\Delta+$   |
|----------------|----------------|----------------|----------------|-------------|
| Sst            | 0.58           | 0.2            | 0.2            | 0.37        |
| Pp             | 0.79           | 0.7            | 0.91           | 0.64        |
| Chl            | <b>0.049</b>   | 0.68           | 0.45           | 0.46        |
| <b>p-value</b> | <b>0.02</b>    | <b>0.052</b>   | <b>0.55</b>    | <b>0.25</b> |

**Table S4.** Average annual values of the environmental variables with which the correlation test was constructed. Sst: Sea surface temperature, Pp: Primary productivity, Chl: Chlorophyll concentration.

|             | Sst (°C) | Pp<br>(mgC m <sup>-2</sup><br>/day <sup>-1</sup> ) | Chl<br>(mg/m <sup>-3</sup> ) |
|-------------|----------|----------------------------------------------------|------------------------------|
| <b>IM10</b> | 26.47    | 4414.52                                            | 2.7660792                    |
| <b>IM11</b> | 26.22    | 11982.07                                           | 4.2231621                    |
| <b>IM12</b> | 27.52    | 6730.96                                            | 2.8593195                    |
| <b>IM13</b> | 25.94    | 2754.67                                            | 3.8458248                    |
| <b>IM14</b> | 28.35    | 3222.81                                            | 4.9234728                    |
| <b>IM15</b> | 28.67    | 3646.06                                            | 1.7425727                    |
| <b>IM16</b> | 28.33    | 1011.98                                            | 0.9601711                    |
| <b>IM17</b> | 27.35    | 5737.96                                            | 4.0012908                    |
| <b>II10</b> | 26.87    | 899.09                                             | 0.6865444                    |
| <b>II11</b> | 26.81    | 2183.55                                            | 0.6867144                    |
| <b>II12</b> | 26.95    | 1420.78                                            | 0.7285117                    |
| <b>II13</b> | 26.29    | 844.67                                             | 0.9885047                    |
| <b>II15</b> | 28.87    | 880.38                                             | 0.6757157                    |
| <b>II17</b> | 28.26    | 699.04                                             | 0.443323                     |
